# Supplementary material for: α-Alkylation of arylacetonitriles with primary alcohols catalyzed by backbone modified N-heterocyclic carbene iridium(i) complexes
Source: Royal Society of Chemistry journal article supplement (doi:10.1039/d0dt04082g), 2020-12-31
Supplement: d0dt04082g1.pdf [file d0dt04082g1.pdf]

## Supporting Information

### **$\alpha$ -Alkylation of Arylacetonitriles with Primary Alcohols Catalyzed by Backbone Modified N-Heterocyclic Carbene Iridium(I) Complexes**

Burcu Arslan and Süleyman Gülcemal\*

Department of Chemistry, Ege University 35100 Bornova, Izmir, Turkey

\* E-mail: [suleyman.gulcema1@ege.edu.tr](mailto:suleyman.gulcema1@ege.edu.tr)

## Contents

|                                                                                                                                                 |        |
|-------------------------------------------------------------------------------------------------------------------------------------------------|--------|
| 1. Traces of $^1\text{H}$ and $^{13}\text{C}$ NMR spectra and HRMS analysis of complexes <b>1d-f</b> .....                                      | S3-S8  |
| 2. Traces of $^1\text{H}$ and $^{13}\text{C}$ NMR spectra of products <b>4a-p</b> / <b>6a-e</b> and HRMS analysis of products <b>4m,n</b> ..... | S8-S31 |

# 1. Traces of $^1\text{H}$ and $^{13}\text{C}$ NMR spectra and HRMS analysis of complexes 1d-f

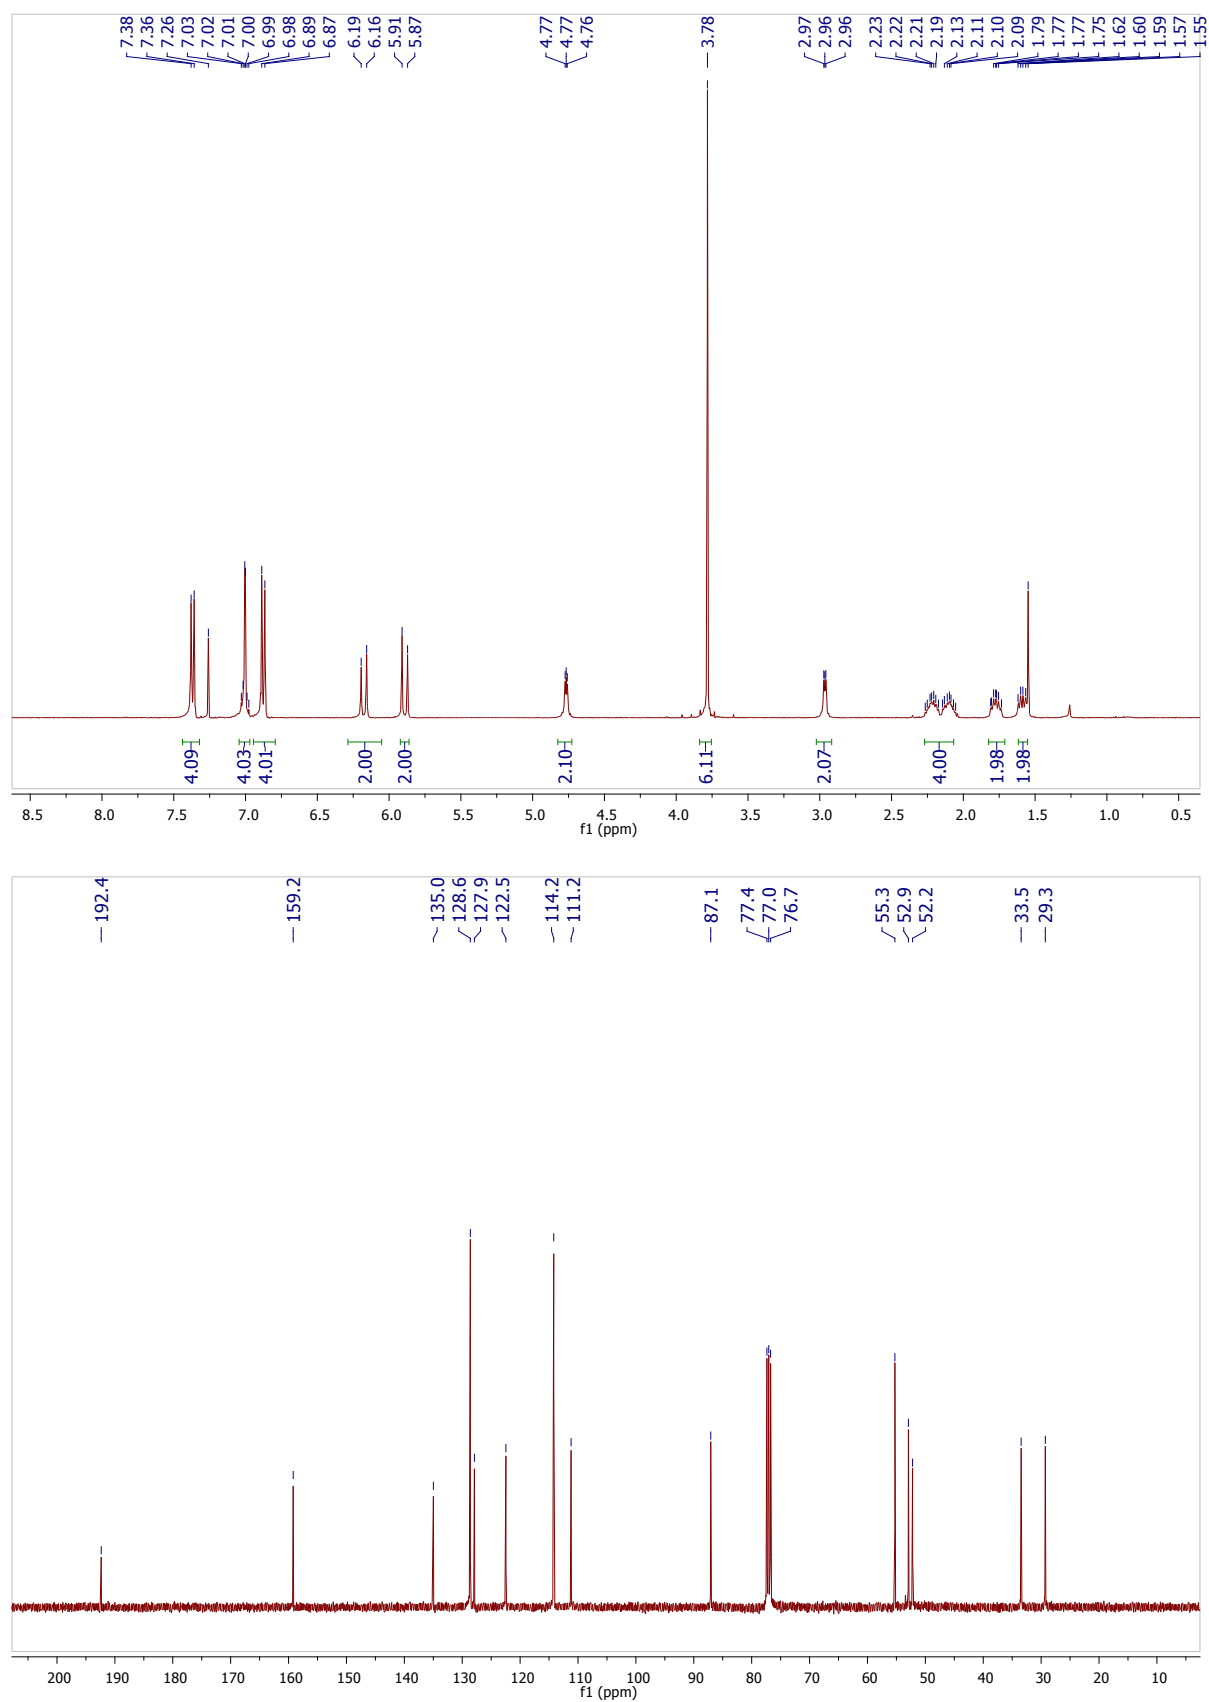

Figure S1.  $^1\text{H}$  and  $^{13}\text{C}$  spectra of compound 1d.

## Qualitative Analysis Report

|                        |              |               |                       |
|------------------------|--------------|---------------|-----------------------|
| Data Filename          | 17_ESI.d     | Sample Name   | 17_ESI                |
| Sample Type            | Sample       | Position      | P1-A2                 |
| Instrument Name        | Instrument 1 | User Name     |                       |
| Acq Method             | ESI pos.m    | Acquired Time | 11/29/2019 2:10:57 PM |
| IRM Calibration Status | Success      | DA Method     | Default.m             |
| Comment                |              |               |                       |

|              |      |                        |                                                   |
|--------------|------|------------------------|---------------------------------------------------|
| Sample Group |      | Info.                  |                                                   |
| Stream Name  | LC 1 | Acquisition SW Version | 6200 series TOF/6500 series Q-TOF 8.06.01 (B6157) |

### User Chromatograms

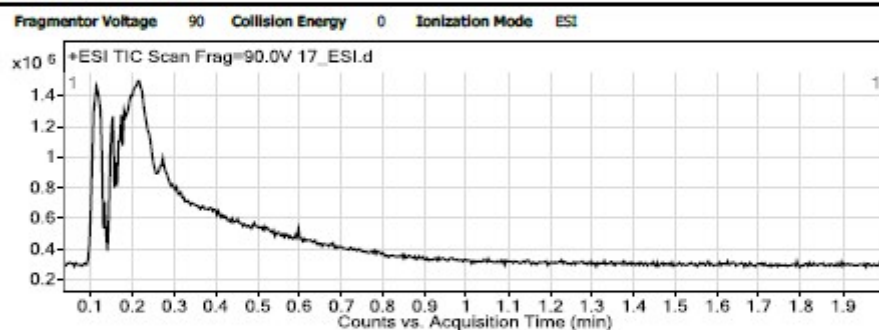

### User Spectra

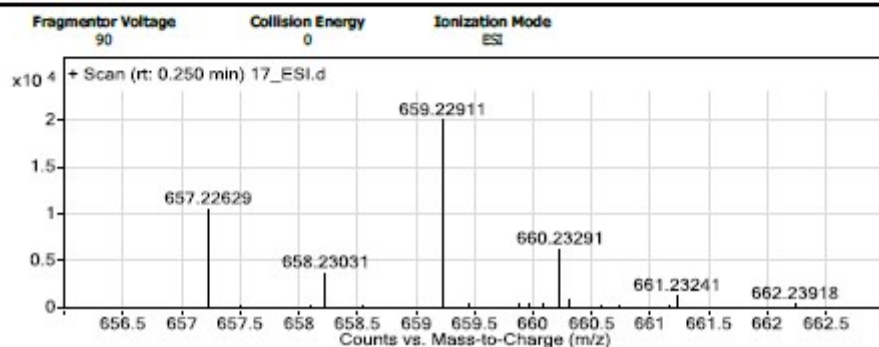

Figure S2. HRMS analysis report of compound **1d**.

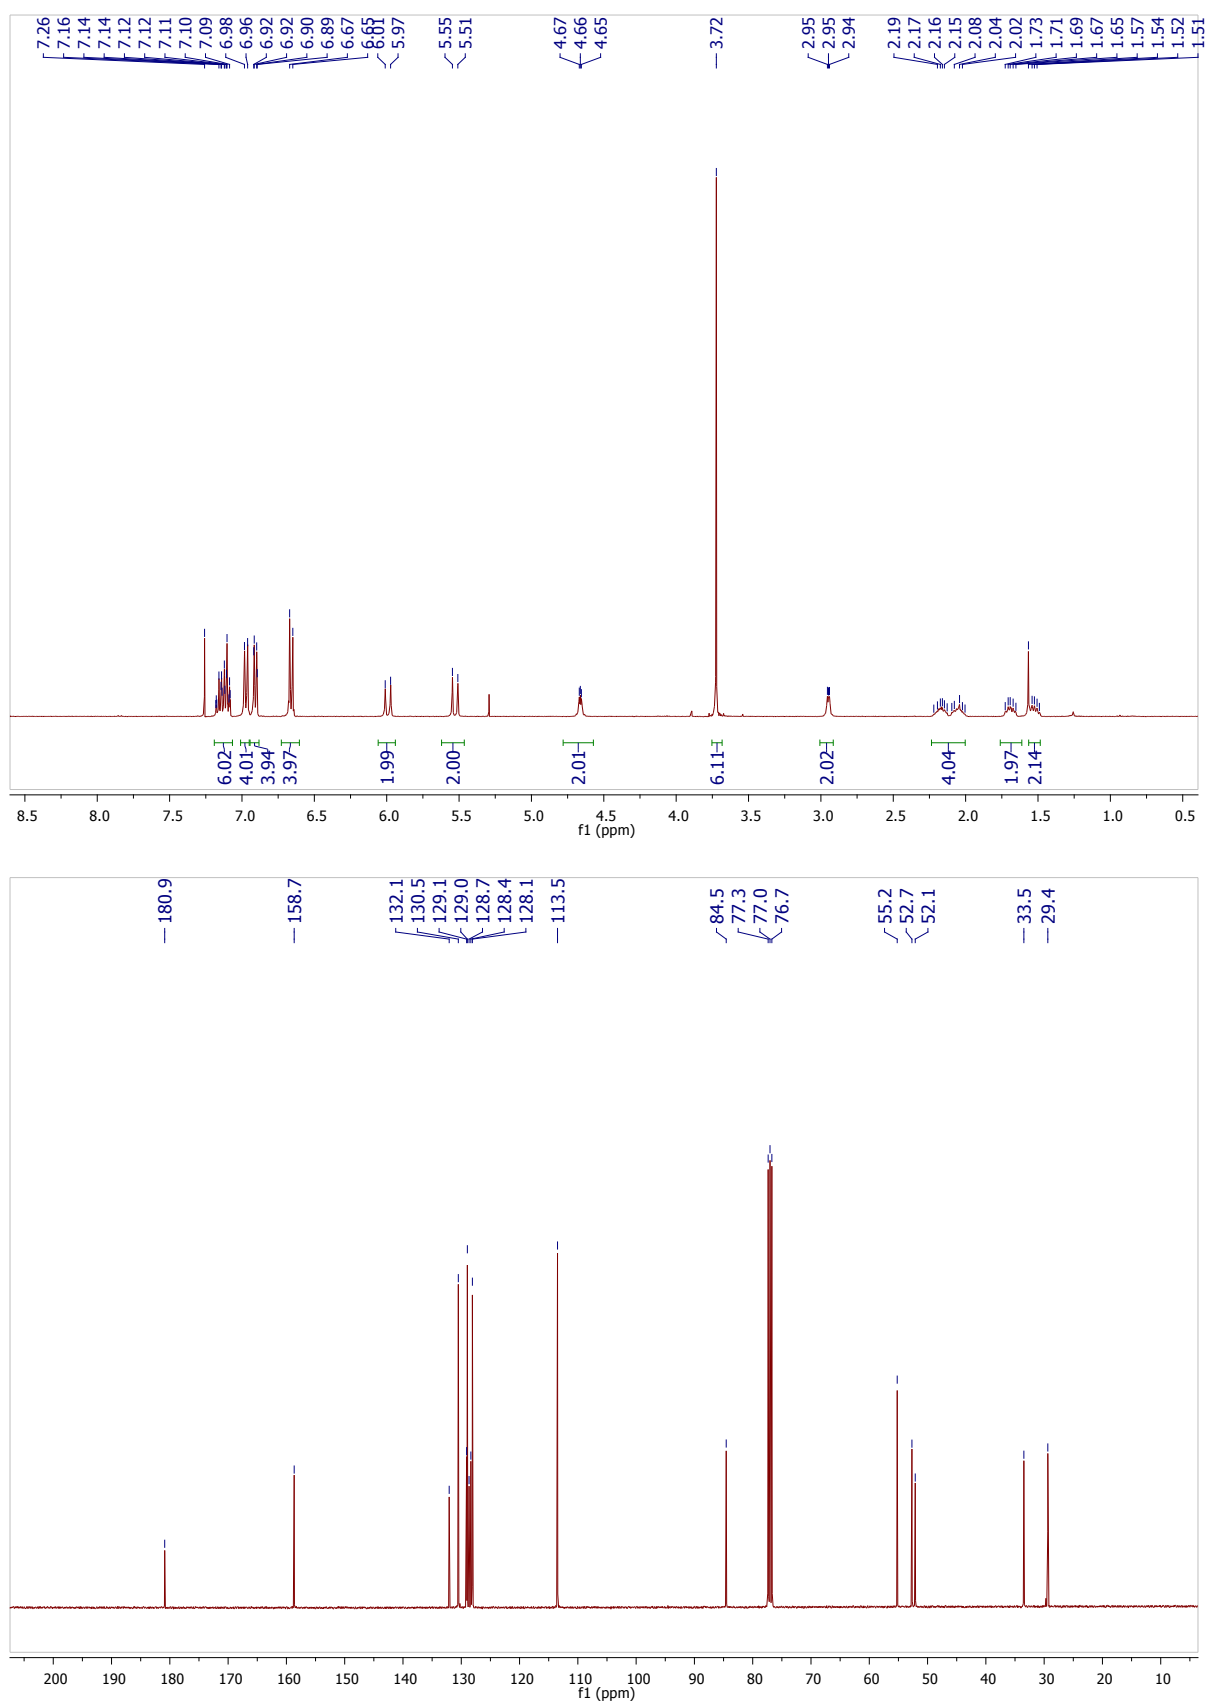

**Figure S3.**  $^1\text{H}$  and  $^{13}\text{C}$  NMR spectra of compound 1e.

## Qualitative Analysis Report

|                        |              |               |                       |
|------------------------|--------------|---------------|-----------------------|
| Data Filename          | 22.d         | Sample Name   | 22                    |
| Sample Type            | Sample       | Position      | P1-A5                 |
| Instrument Name        | Instrument 1 | User Name     |                       |
| Acq Method             | ESI pos.m    | Acquired Time | 11/29/2019 9:45:31 AM |
| IRM Calibration Status | Success      | DA Method     | Default.m             |
| Comment                |              |               |                       |

|              |      |                        |                                                   |
|--------------|------|------------------------|---------------------------------------------------|
| Sample Group |      | Info.                  |                                                   |
| Stream Name  | LC 1 | Acquisition SW Version | 6200 series TOF/6500 series Q-TOF B.06.01 (B6157) |

### User Chromatograms

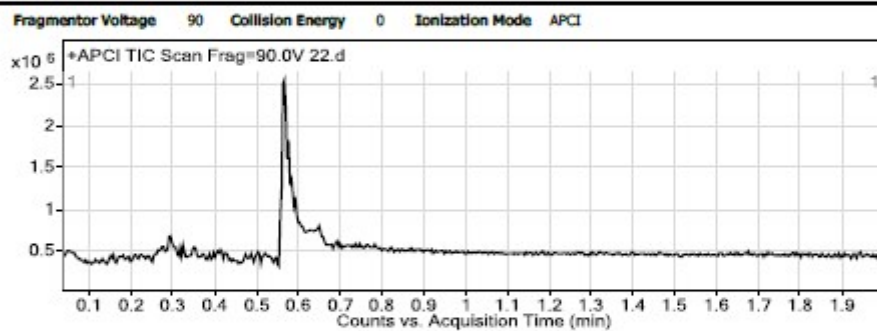

### User Spectra

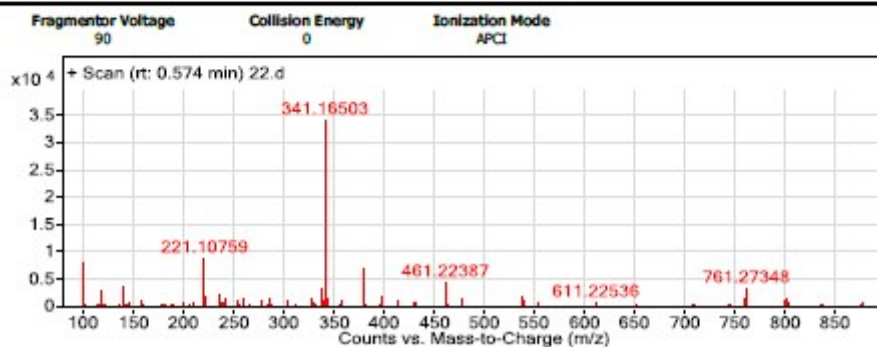

Figure S4. HRMS analysis report of compound **1e**.

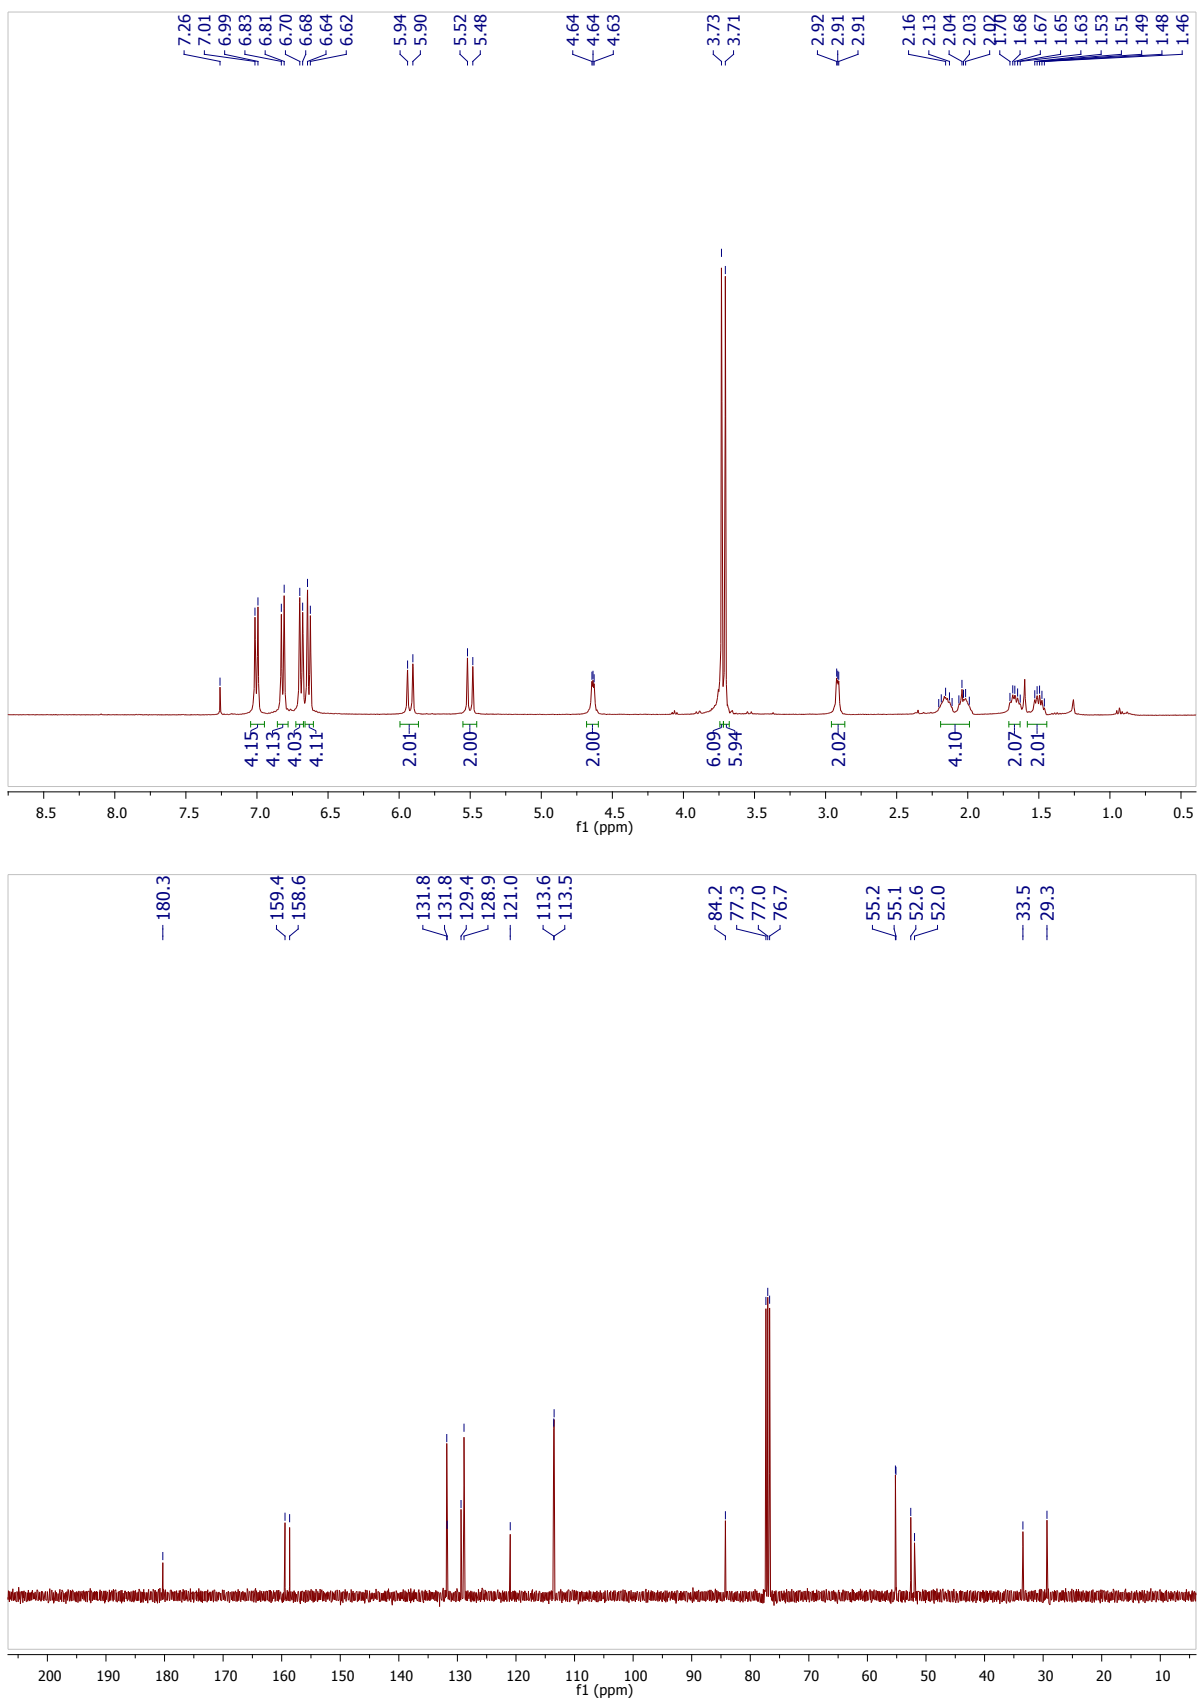

**Figure S5.**  $^1\text{H}$  and  $^{13}\text{C}$  NMR spectra of compound 1f.

## Qualitative Analysis Report

|                        |              |               |                       |
|------------------------|--------------|---------------|-----------------------|
| Data Filename          | 34_1r.d      | Sample Name   | 34_1r                 |
| Sample Type            | Sample       | Position      | P1-A8                 |
| Instrument Name        | Instrument 1 | User Name     |                       |
| Acq Method             | ESI pos.m    | Acquired Time | 11/29/2019 9:53:48 AM |
| IRM Calibration Status | Success      | DA Method     | Default.m             |
| Comment                |              |               |                       |

|              |      |                |                             |
|--------------|------|----------------|-----------------------------|
| Sample Group |      | Info.          |                             |
| Stream Name  | LC 1 | Acquisition SW | 6200 series TOF/6500 series |
|              |      | Version        | Q-TOF B.06.01 (B6157)       |

### User Chromatograms

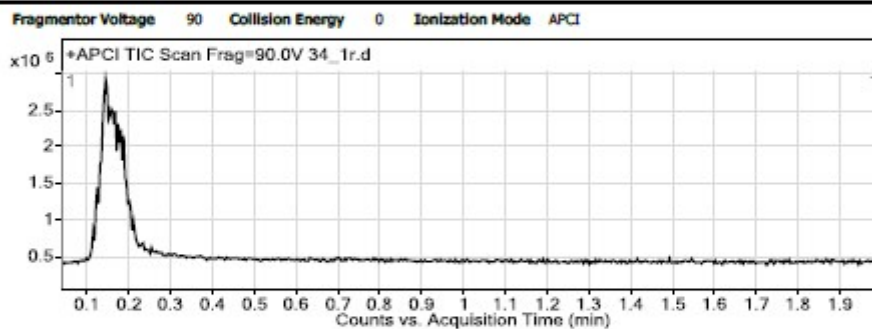

### User Spectra

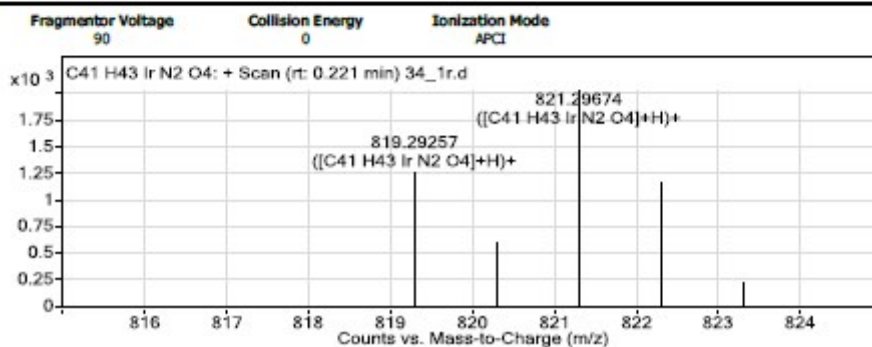

Figure S6. HRMS analysis report of compound **1f**.



## 2. Traces of $^1\text{H}$ and $^{13}\text{C}$ NMR spectra of products 4a-p / 6a-e and HRMS analysis of products 4m,n

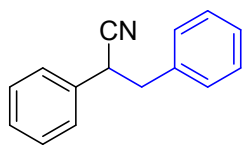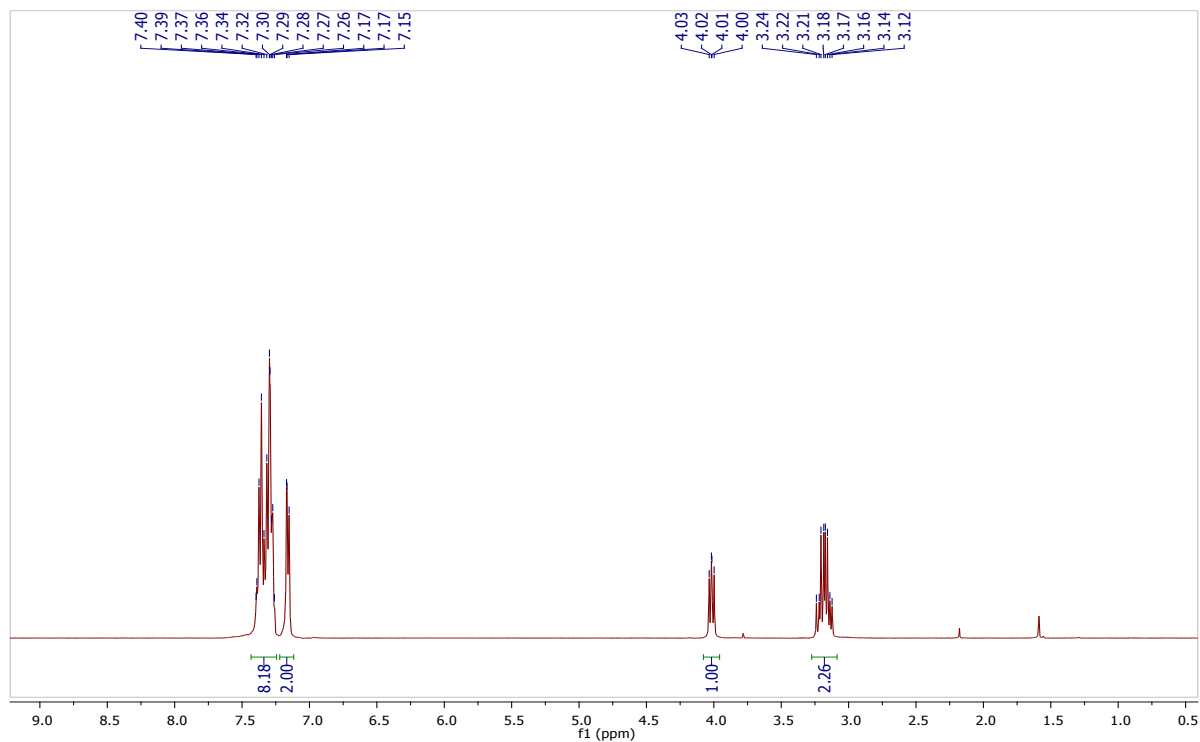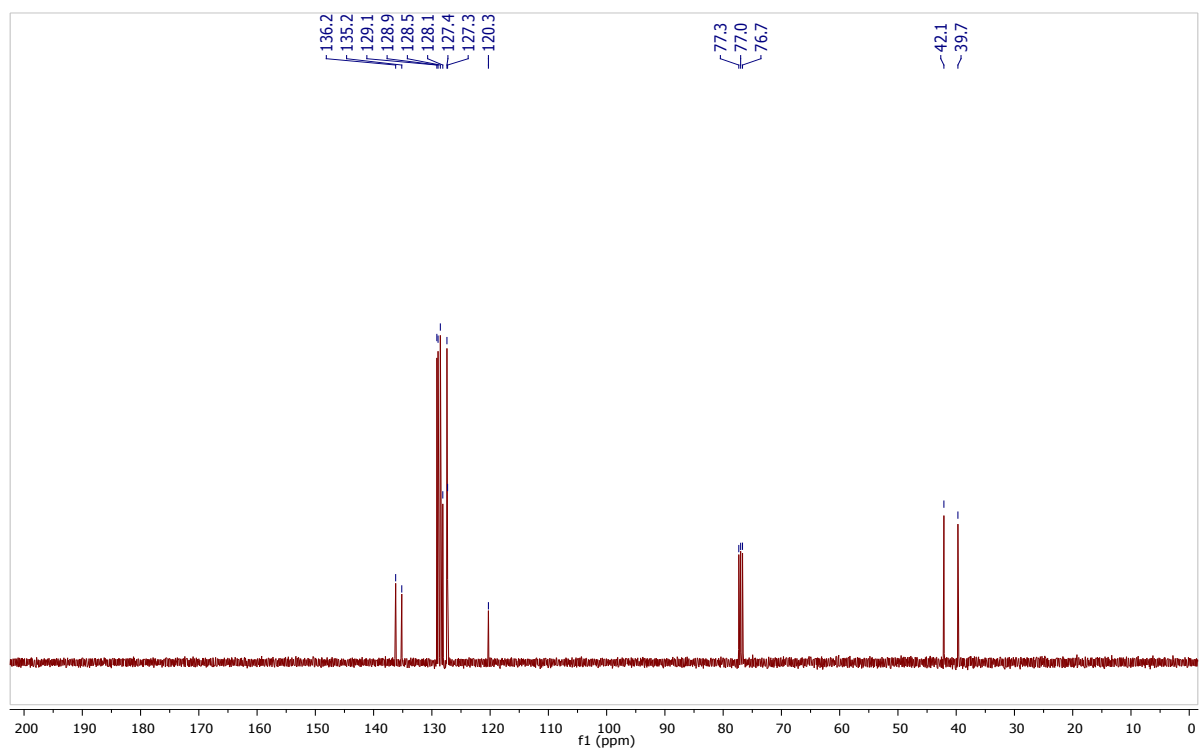

Figure S7.  $^1\text{H}$  and  $^{13}\text{C}$  NMR spectra of 4a.

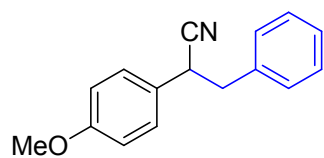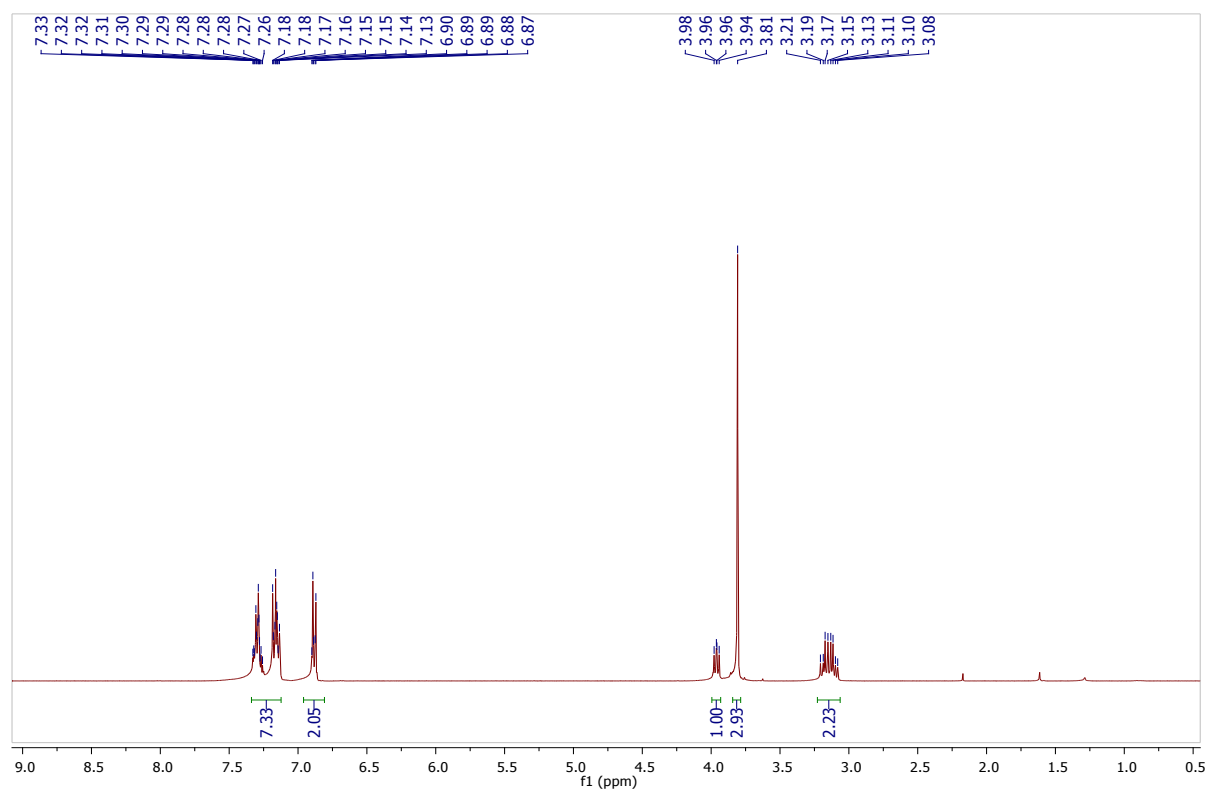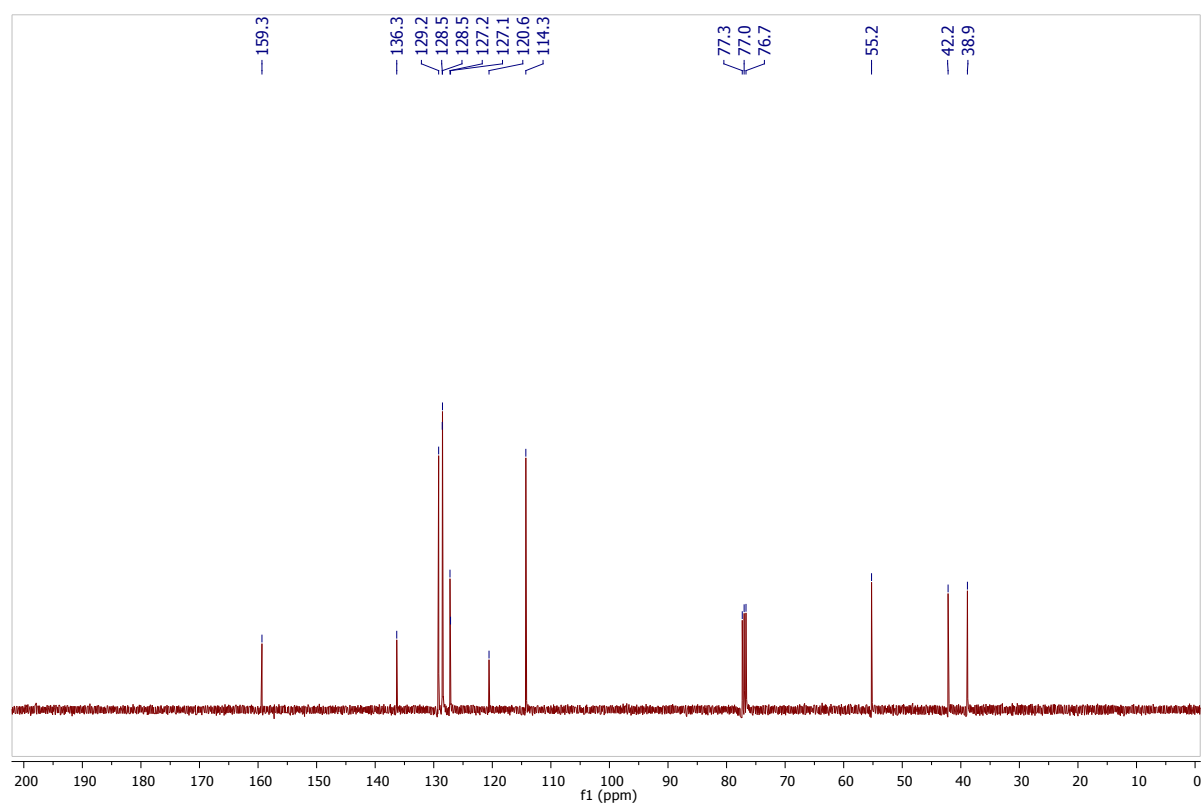

Figure S8. <sup>1</sup>H and <sup>13</sup>C NMR spectra of 4b.

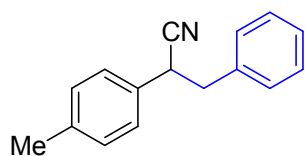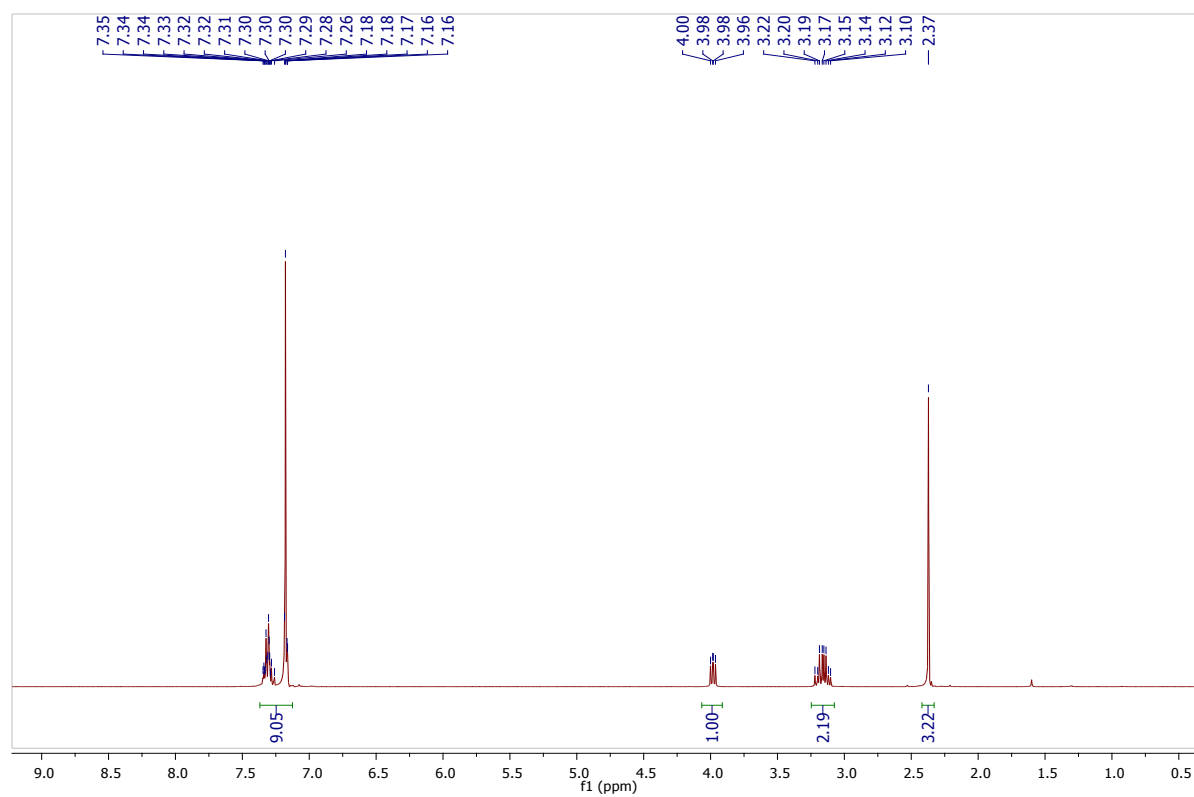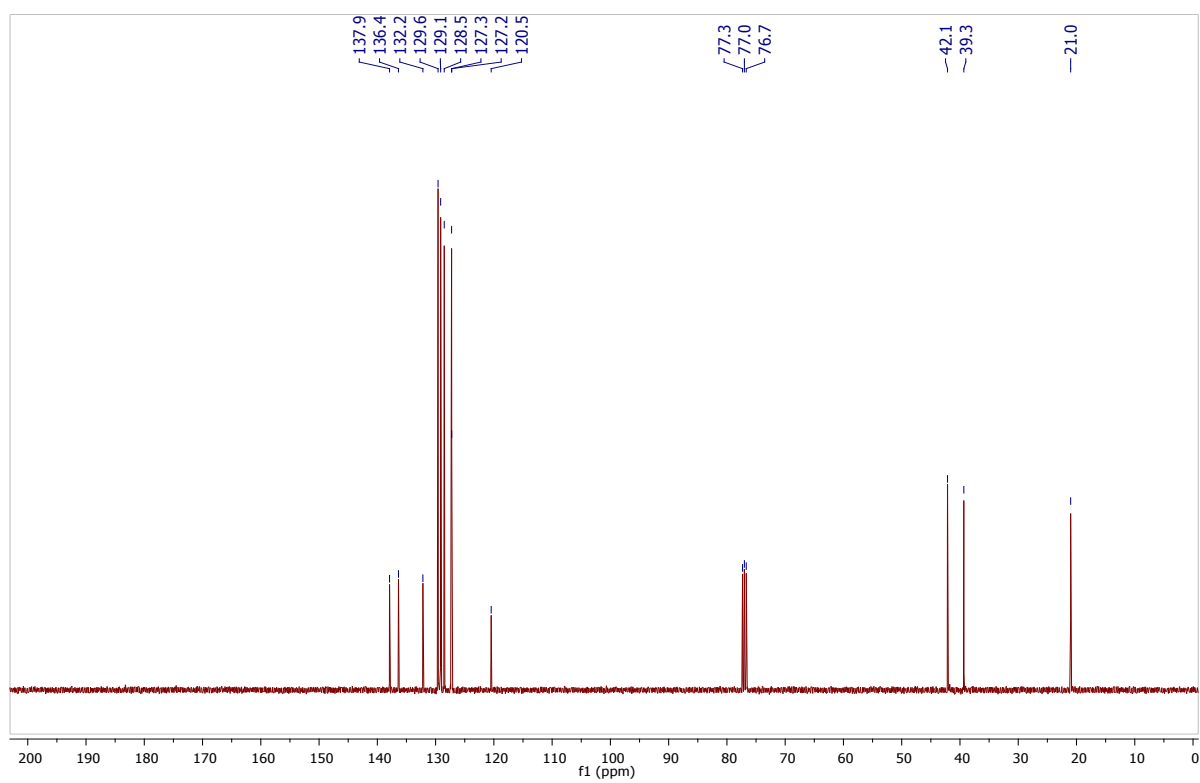

Figure S9. <sup>1</sup>H and <sup>13</sup>C NMR spectra of 4c.

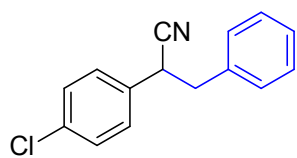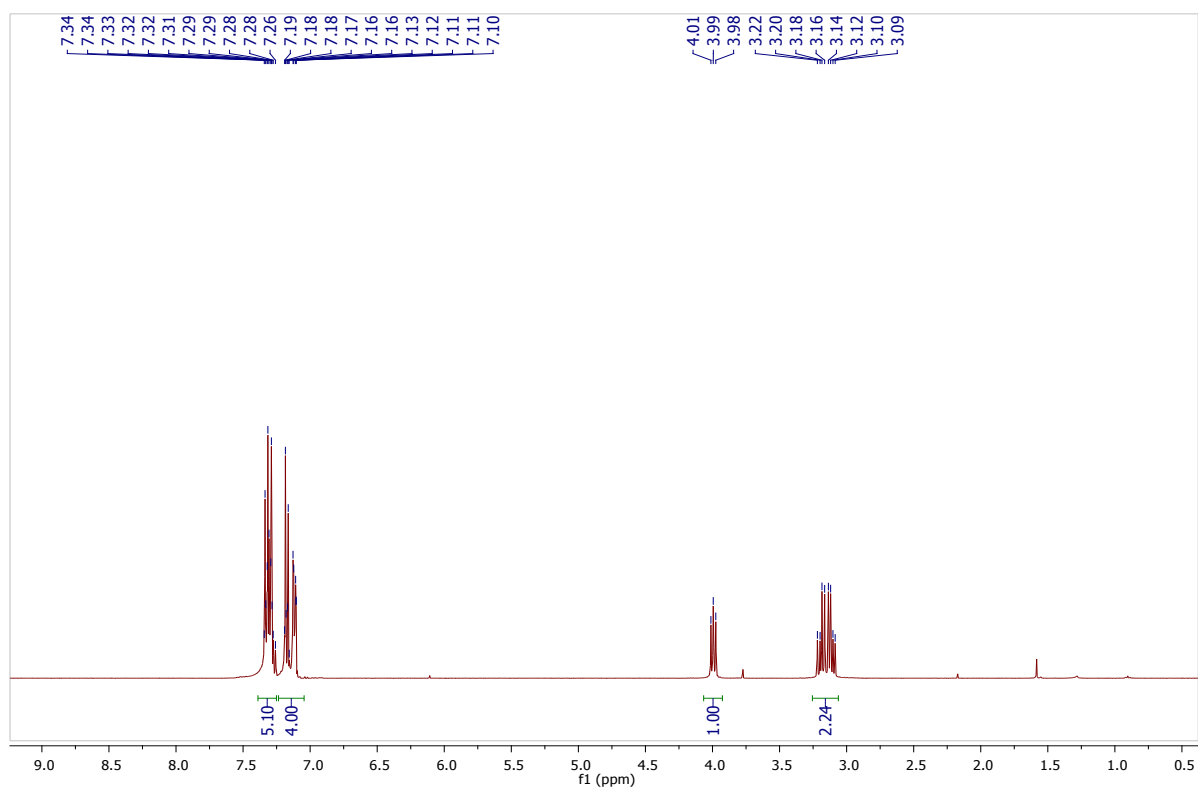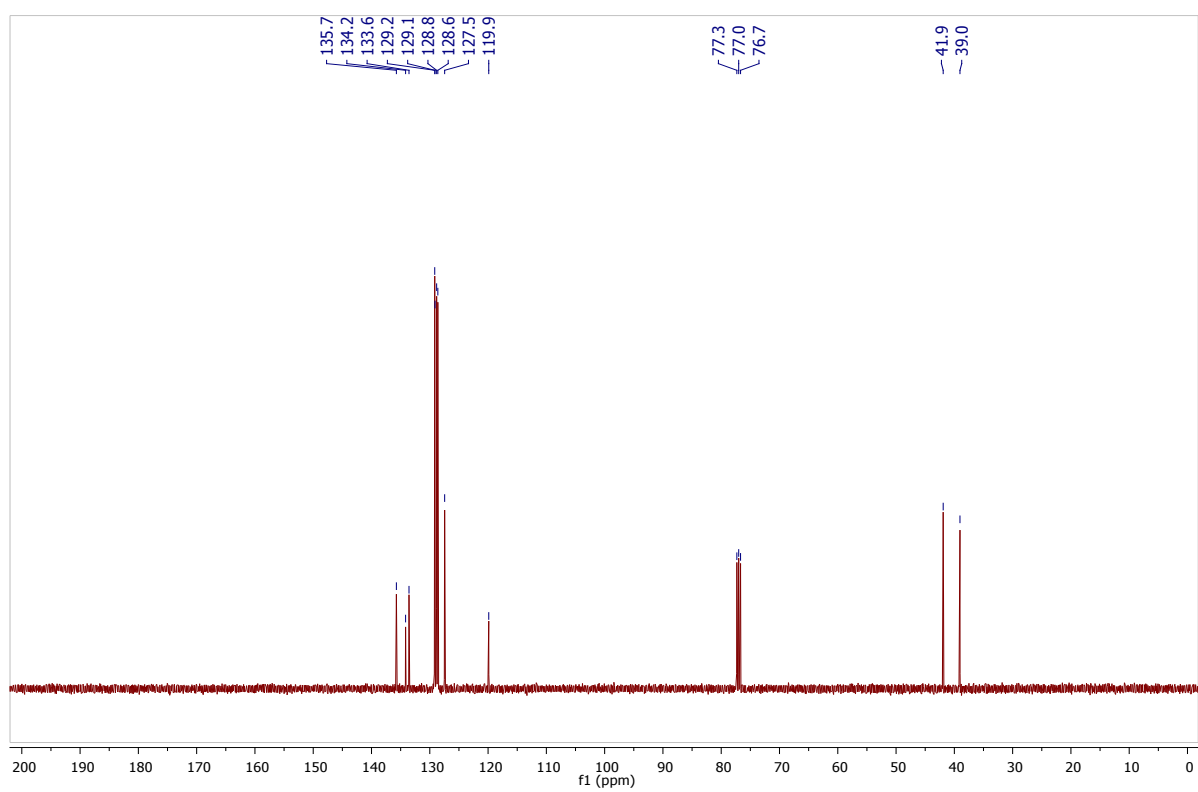

Figure S10. <sup>1</sup>H and <sup>13</sup>C NMR spectra of 4d.

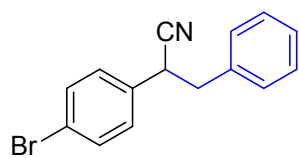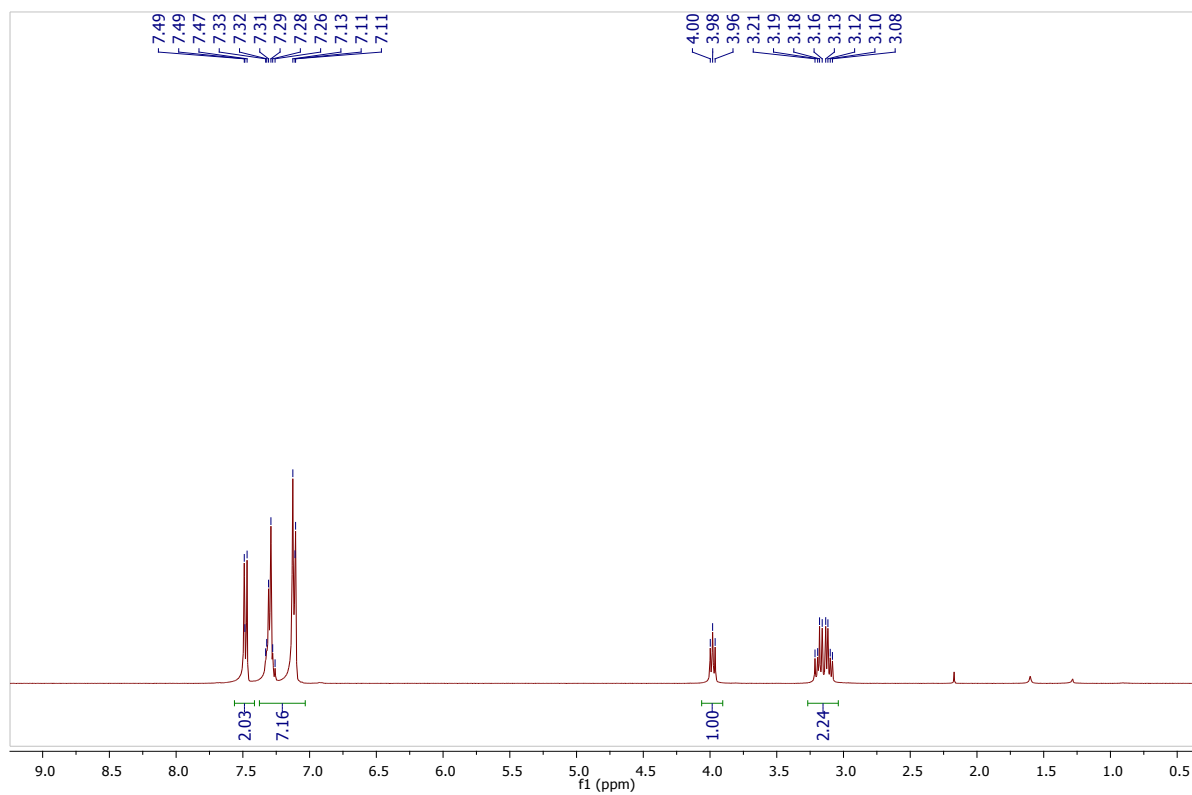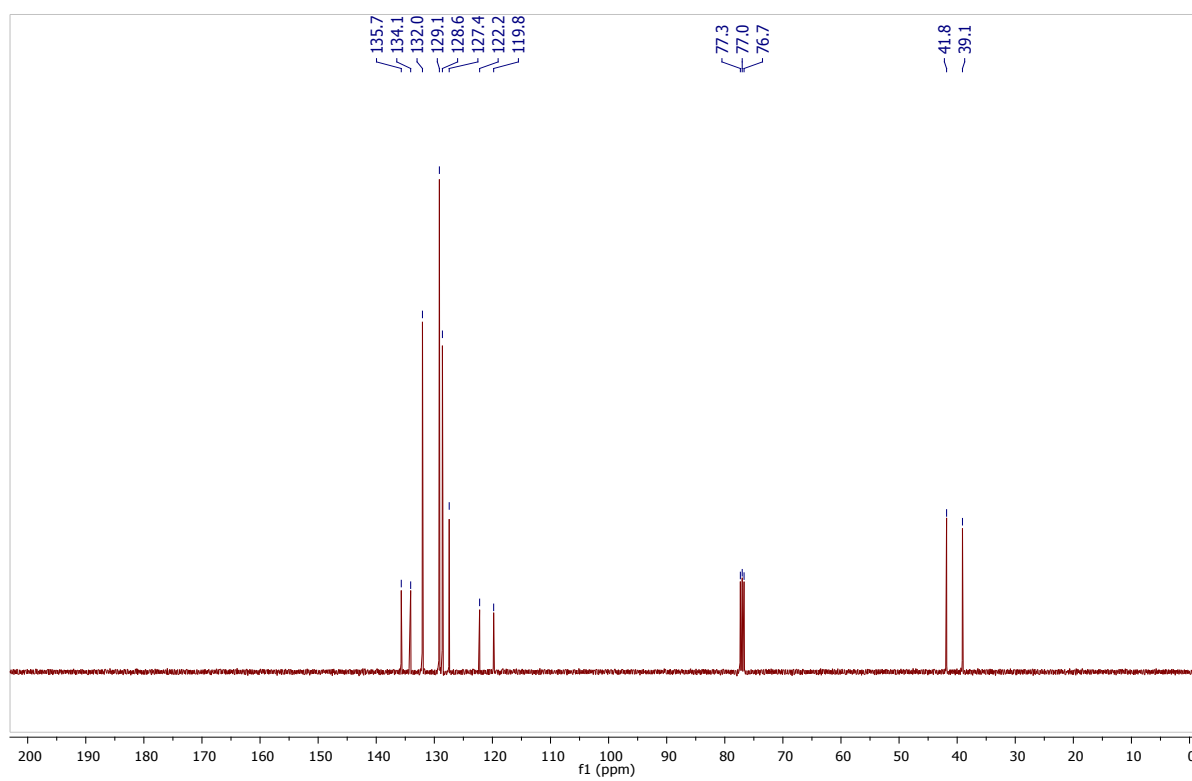

Figure S11. <sup>1</sup>H and <sup>13</sup>C NMR spectra of 4e.

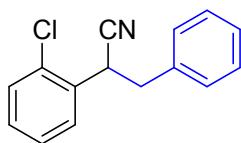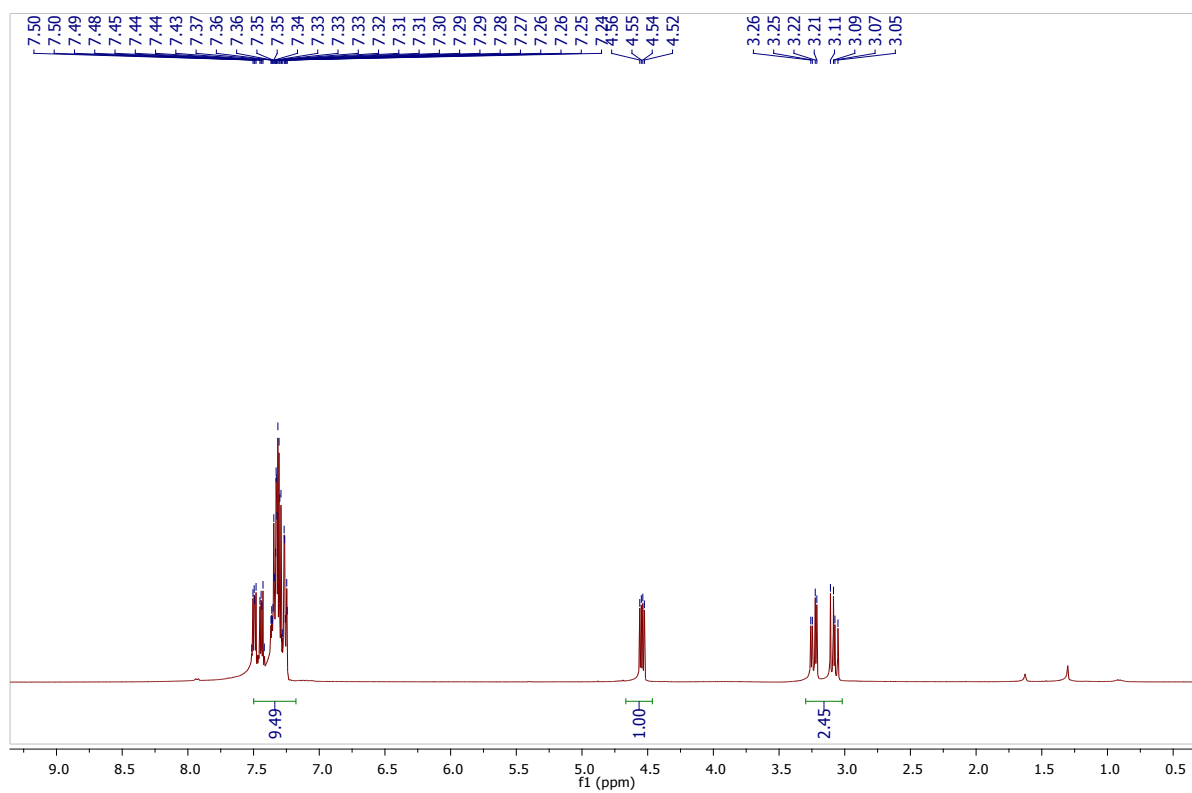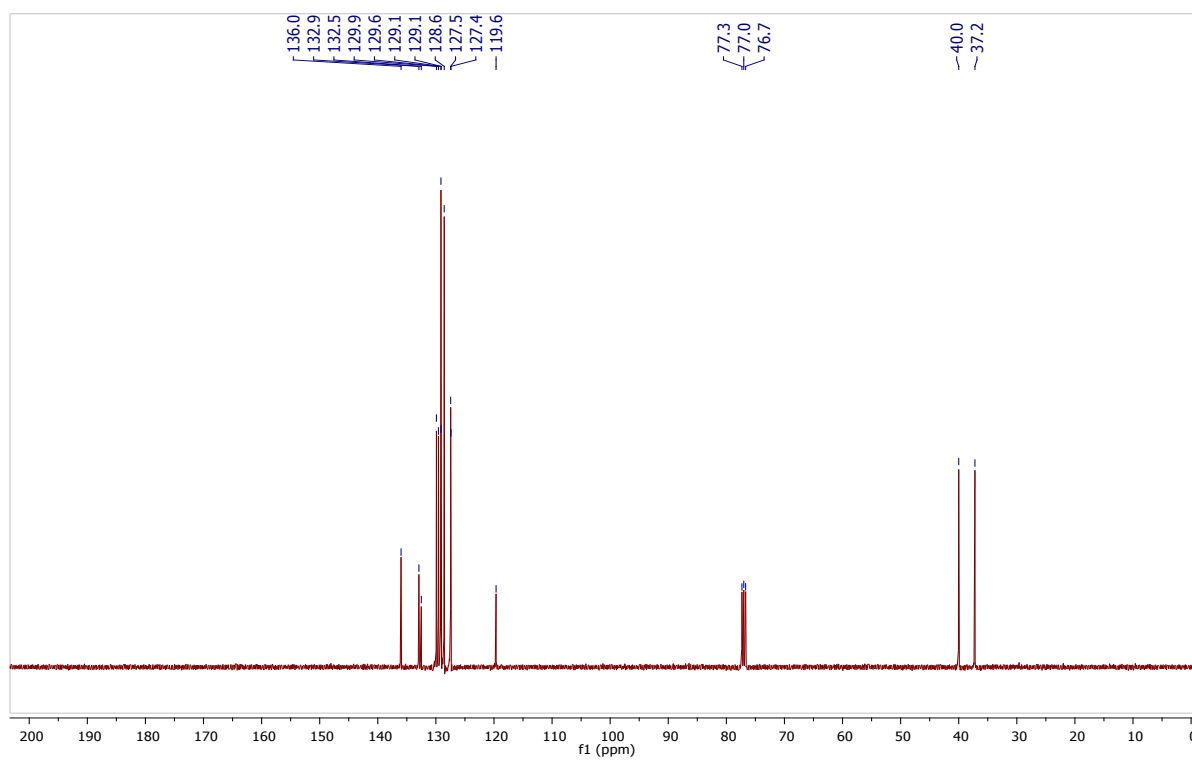

Figure S12. <sup>1</sup>H and <sup>13</sup>C NMR spectra of 4f.

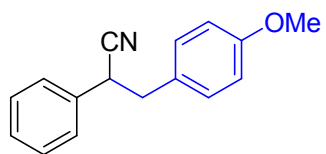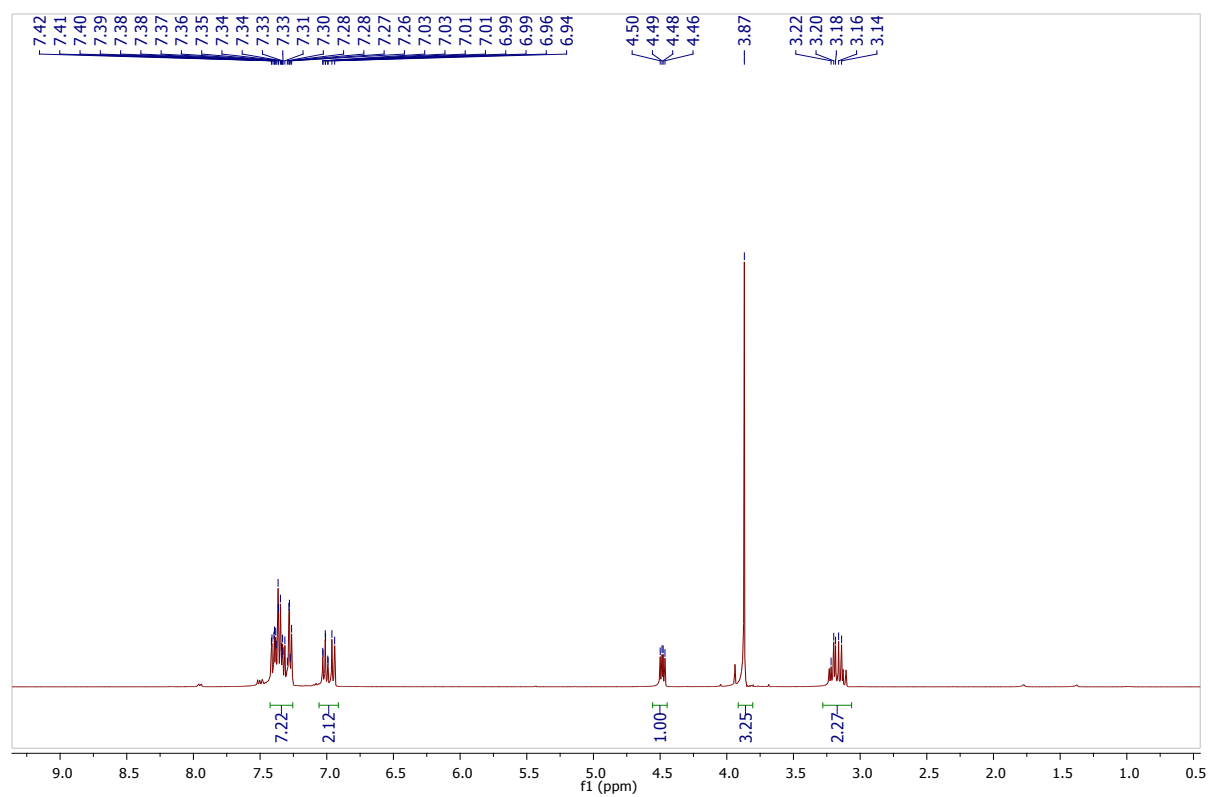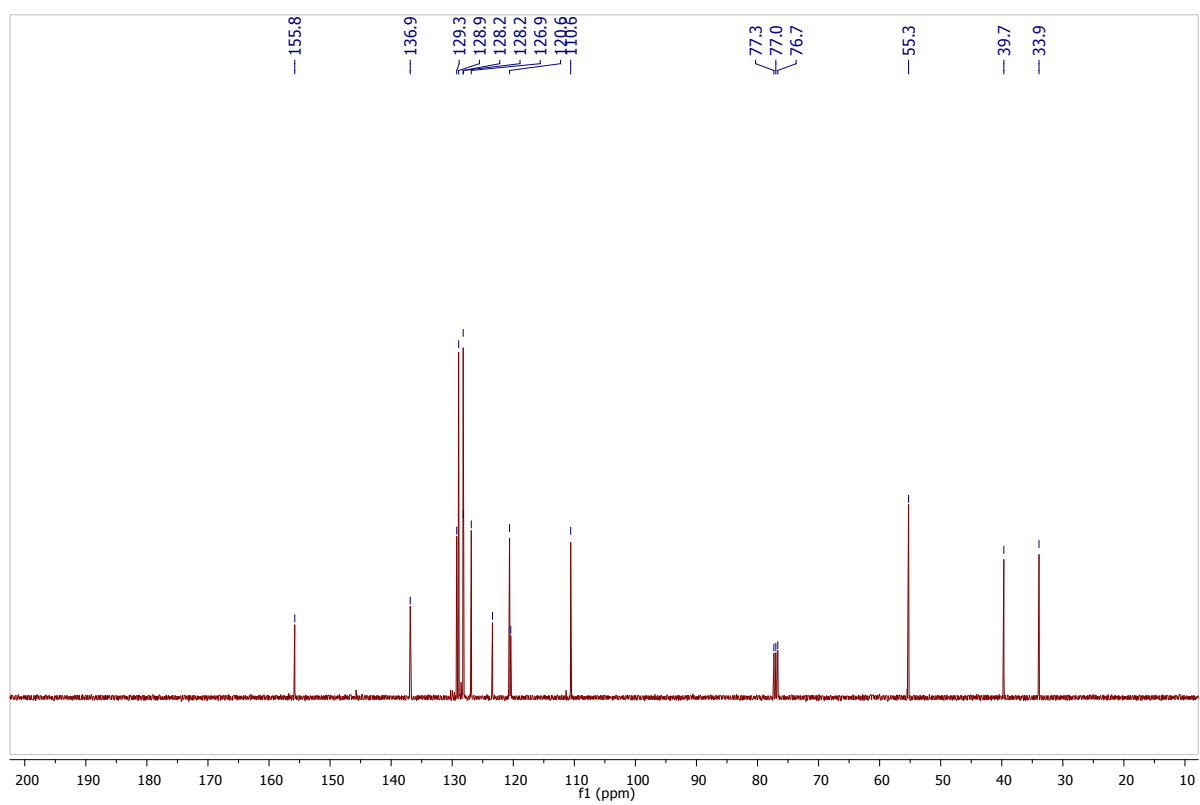

Figure S13. <sup>1</sup>H and <sup>13</sup>C NMR spectra of 4g.

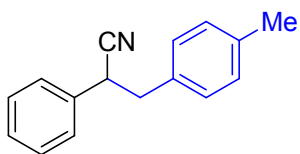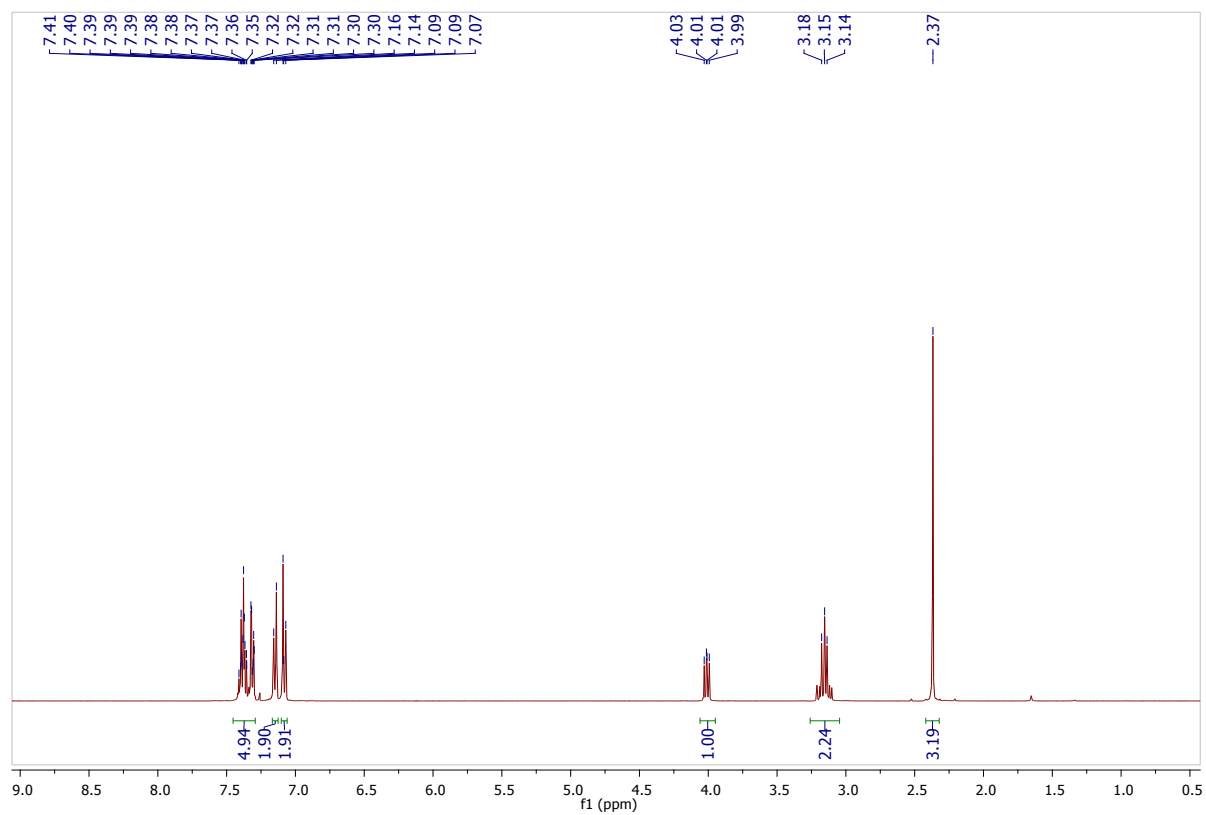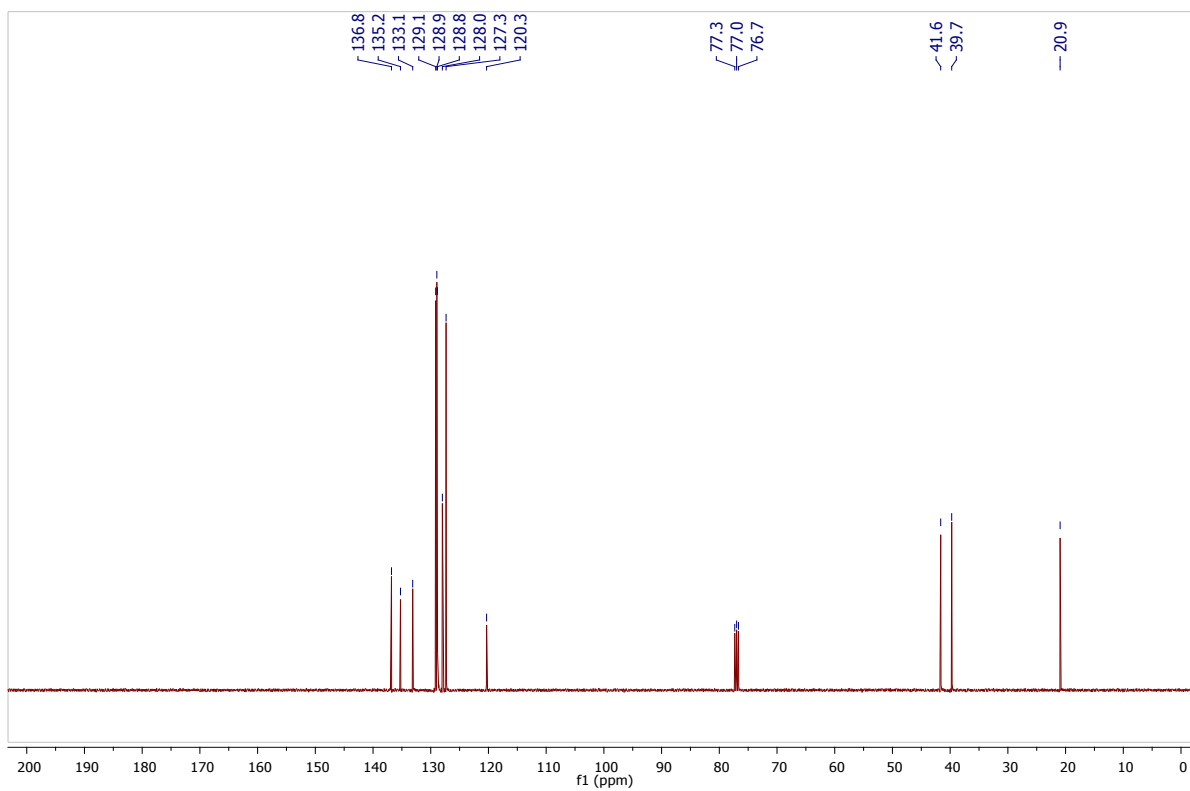

Figure S14. <sup>1</sup>H and <sup>13</sup>C NMR spectra of 4h.



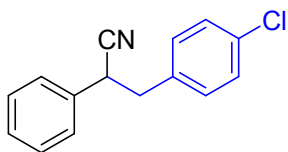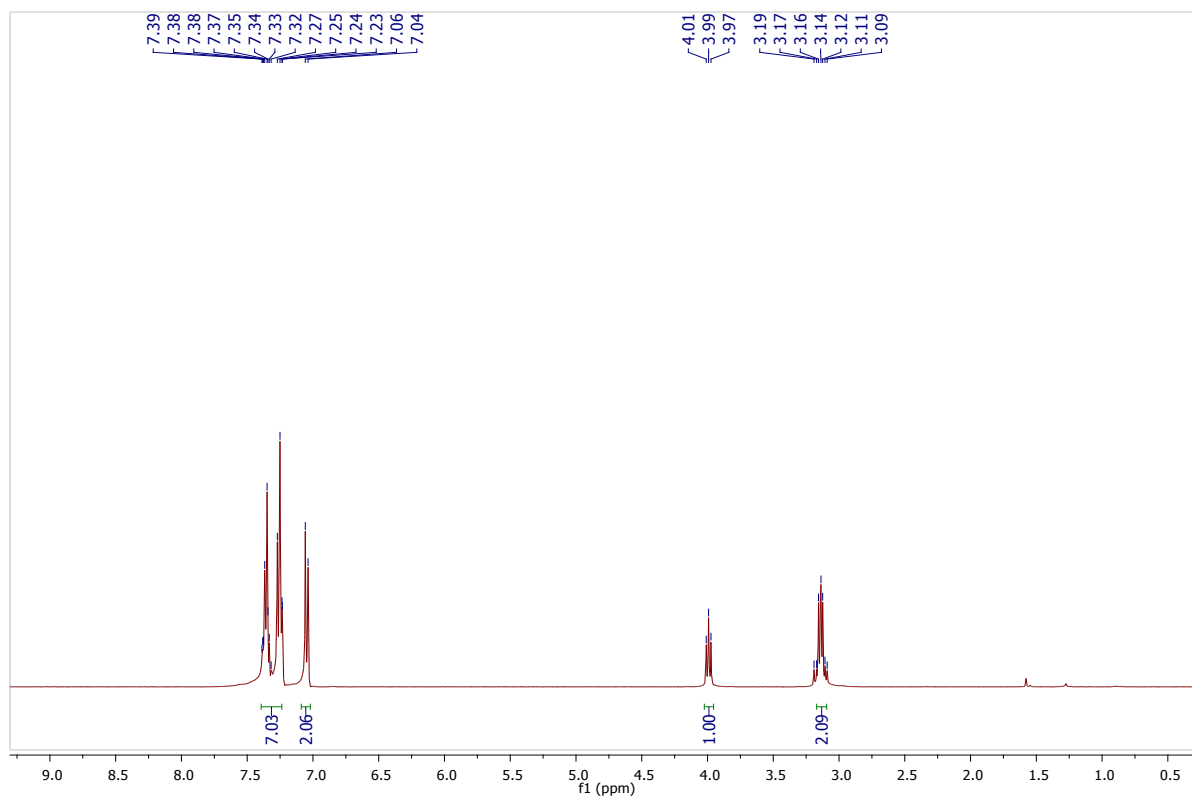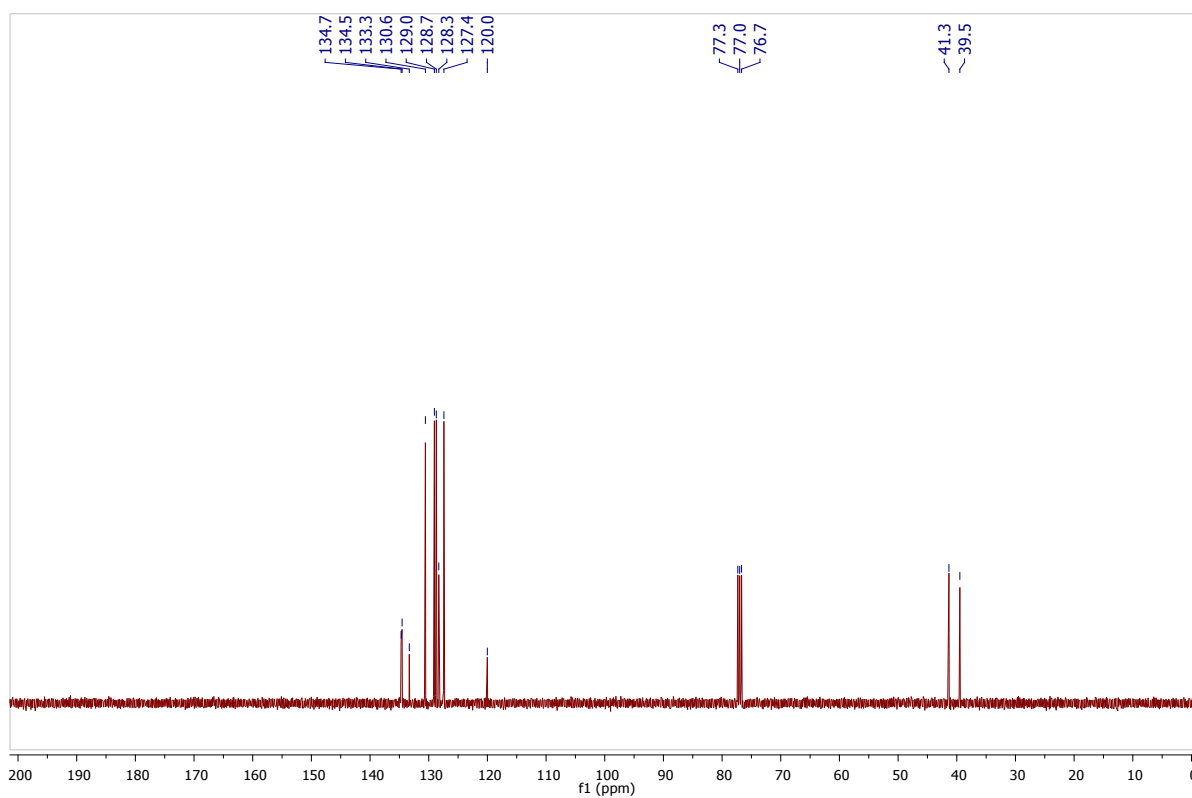

Figure S15. <sup>1</sup>H and <sup>13</sup>C NMR spectra of 4i.

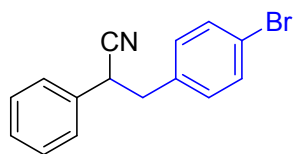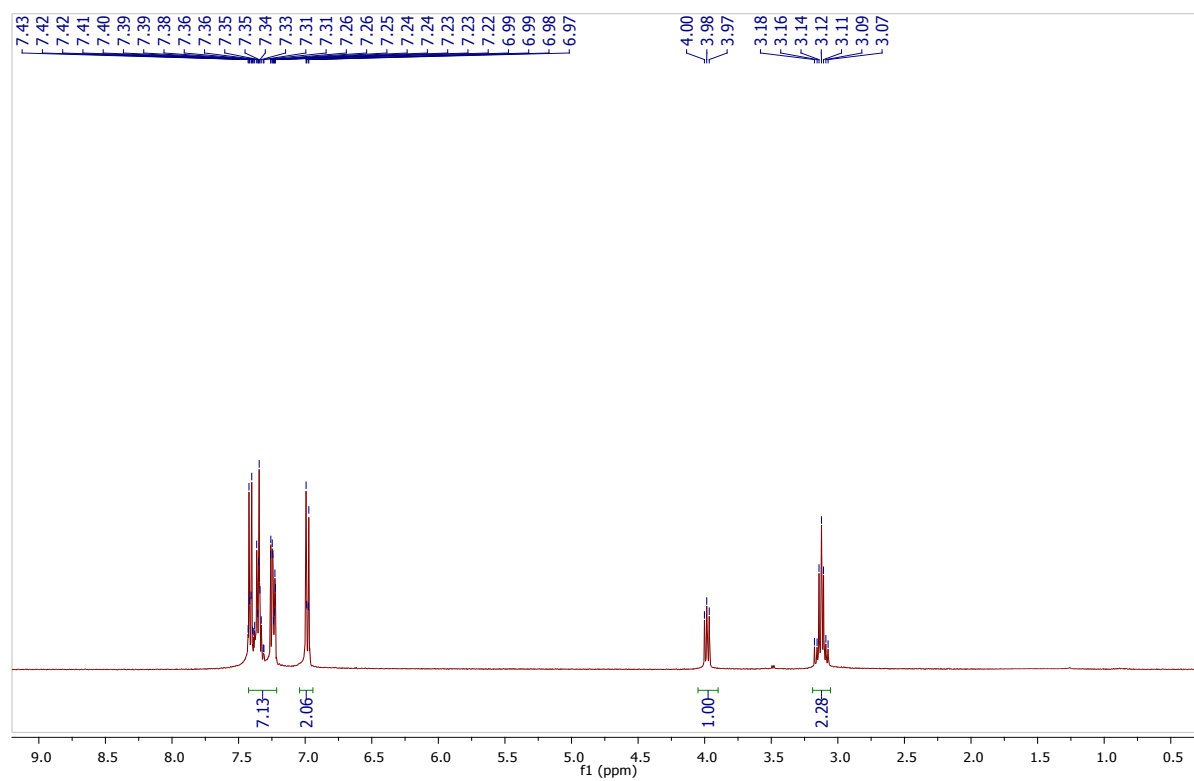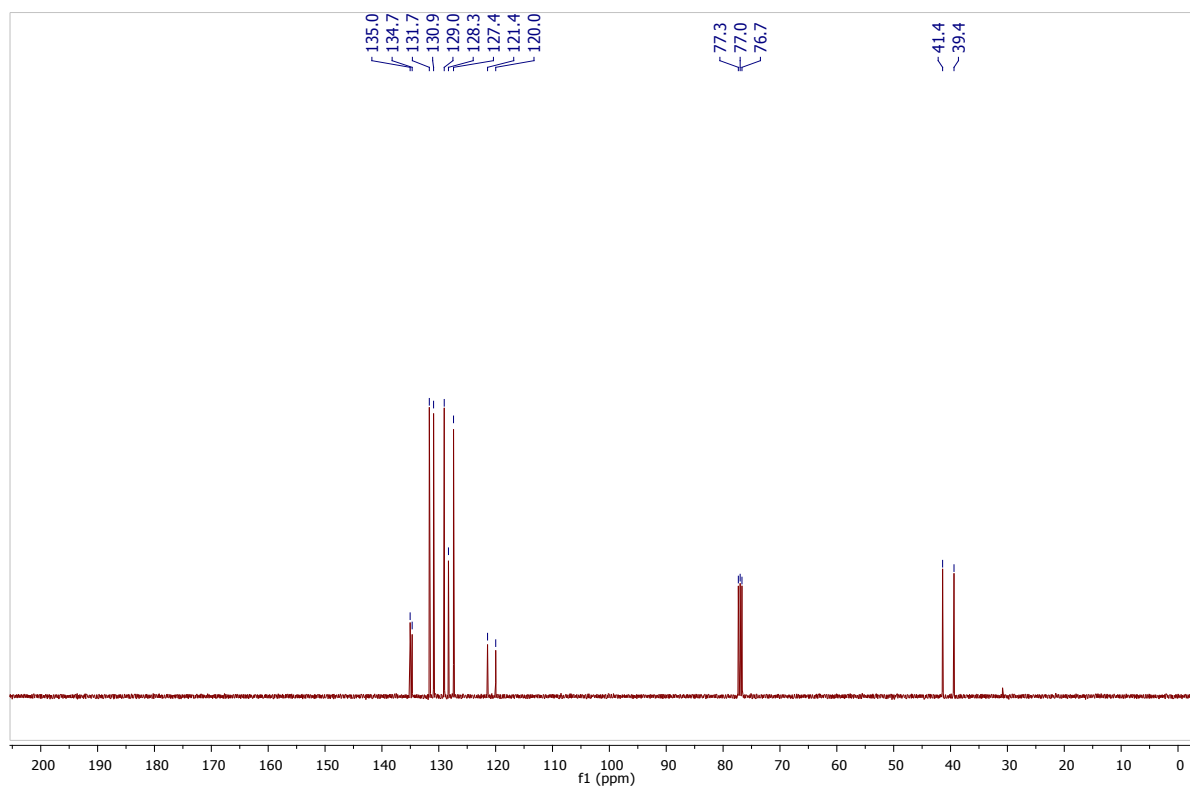

Figure S16. <sup>1</sup>H and <sup>13</sup>C NMR spectra of 4j.

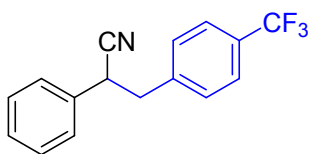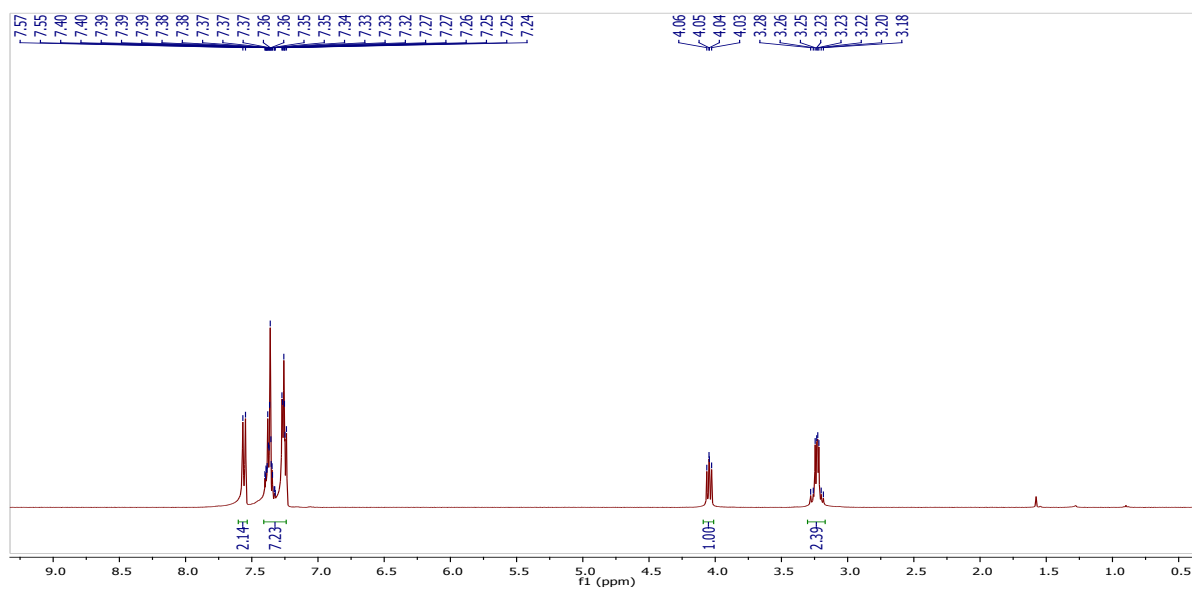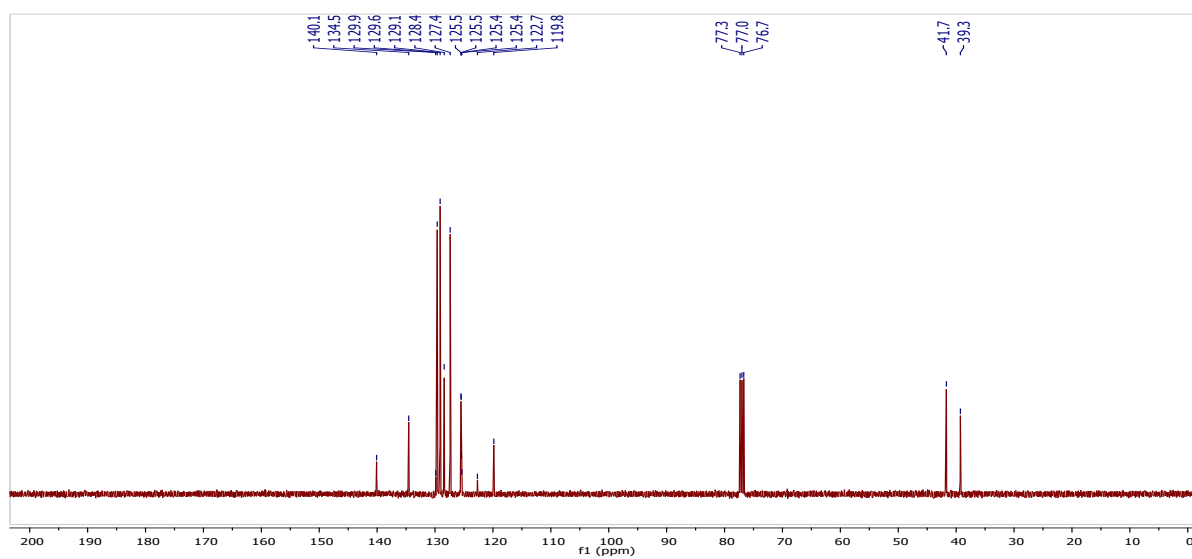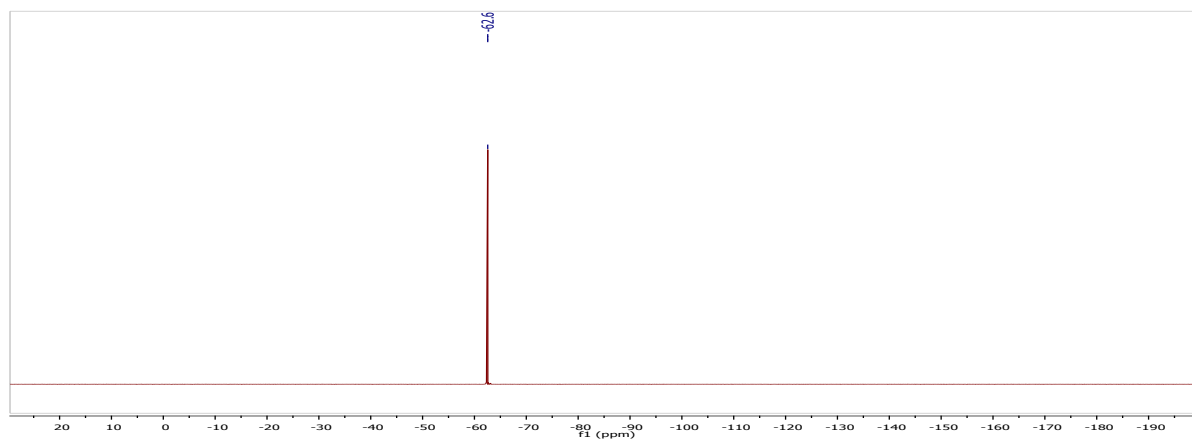

Figure S17. <sup>1</sup>H, <sup>13</sup>C, and <sup>19</sup>F NMR spectra of 4k.

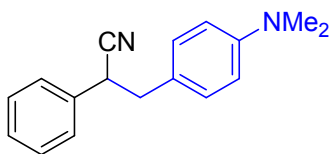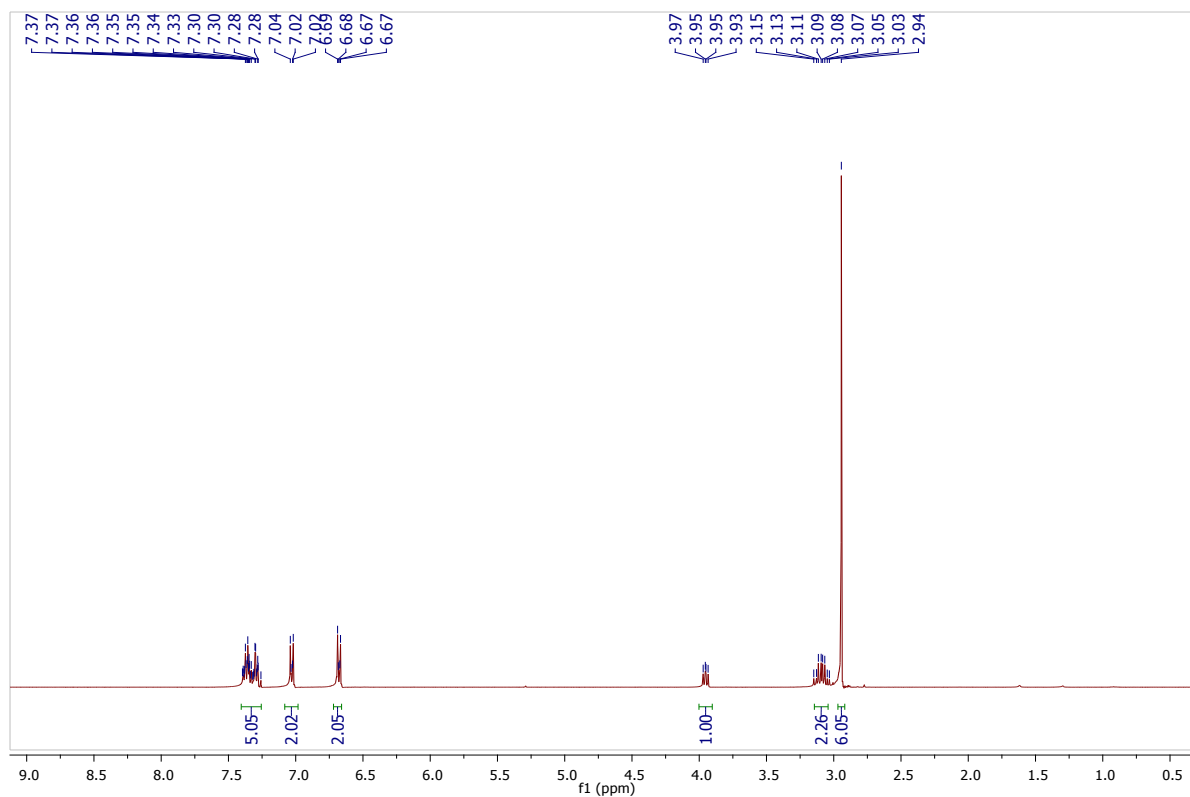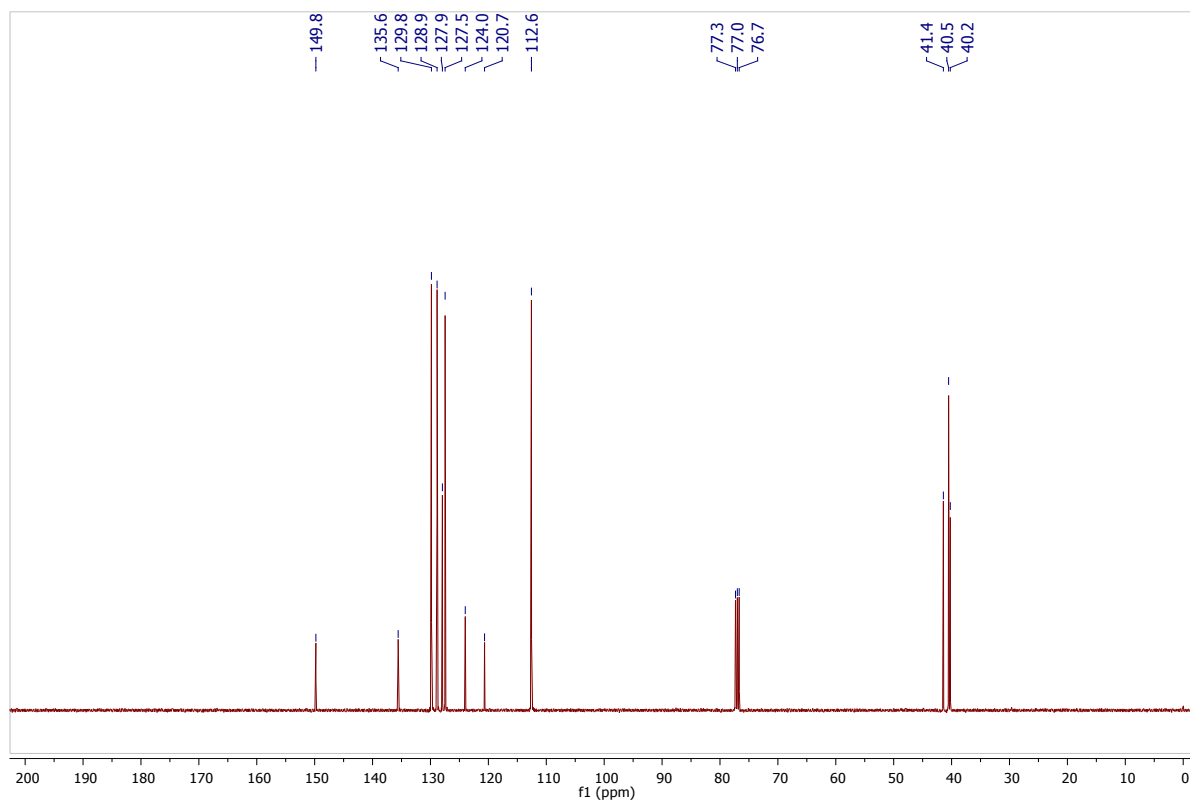

Figure S18. <sup>1</sup>H and <sup>13</sup>C NMR spectra of 4l.

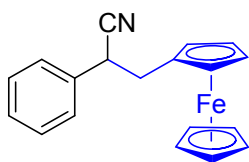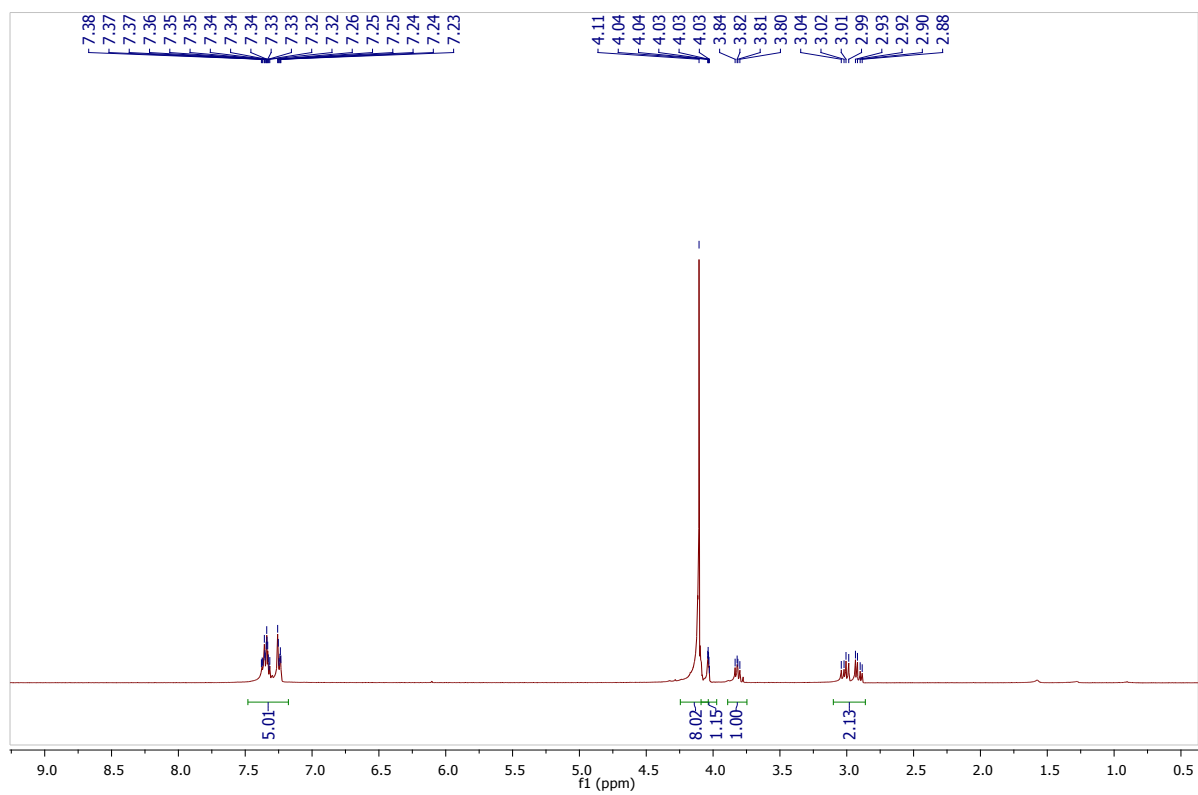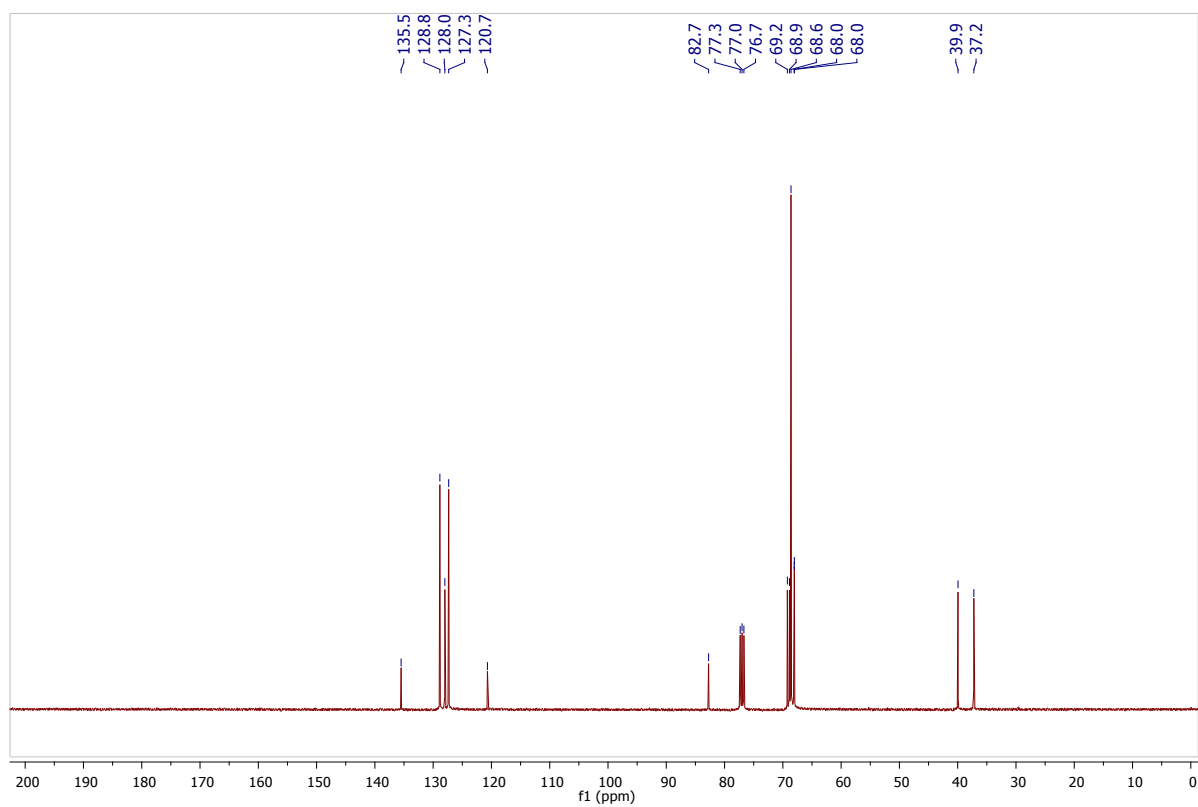

**Figure S19.** <sup>1</sup>H and <sup>13</sup>C NMR spectra of **4m**.

## Qualitative Analysis Report

|                        |              |                |                             |
|------------------------|--------------|----------------|-----------------------------|
| Data Filename          | CN-01.d      | Sample Name    | CN-01                       |
| Sample Type            | Sample       | Position       | P1-E4                       |
| Instrument Name        | Instrument 1 | User Name      |                             |
| Acq Method             | ESI pos.m    | Acquired Time  | 3/3/2020 5:29:12 PM         |
| IRM Calibration Status | Success      | DA Method      | Default.m                   |
| Comment                |              |                |                             |
| Sample Group           |              | Info.          |                             |
| Stream Name            | LC 1         | Acquisition SW | 6200 series TOF/6500 series |
|                        |              | Version        | Q-TOF B.08.00 (B8058.0)     |

### User Chromatograms

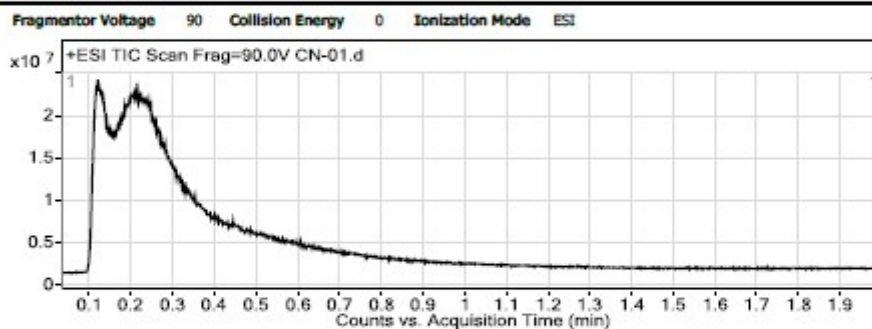

### User Spectra

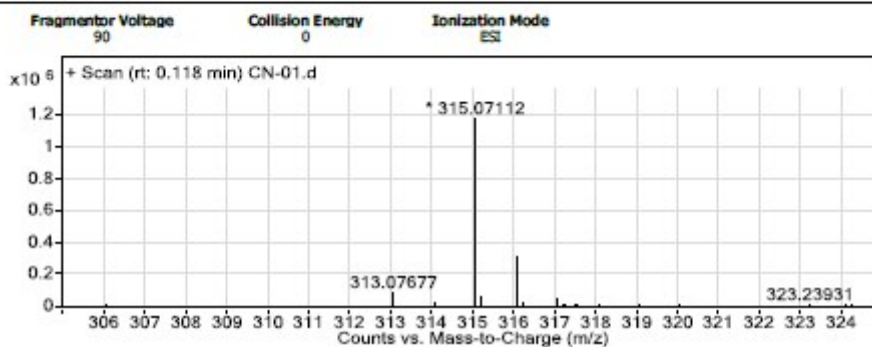

Figure S20. HRMS analysis report of **4m**.

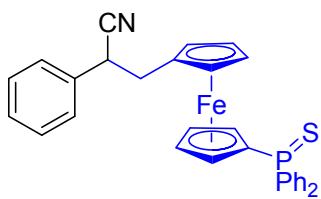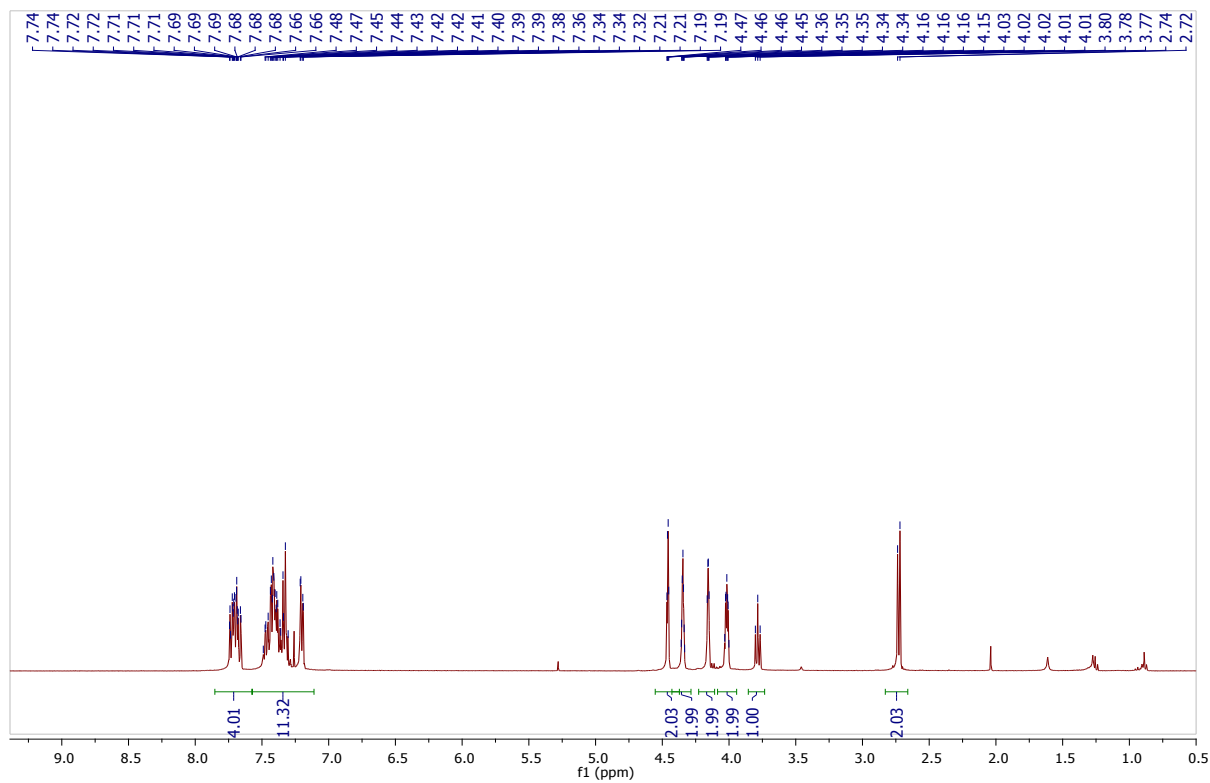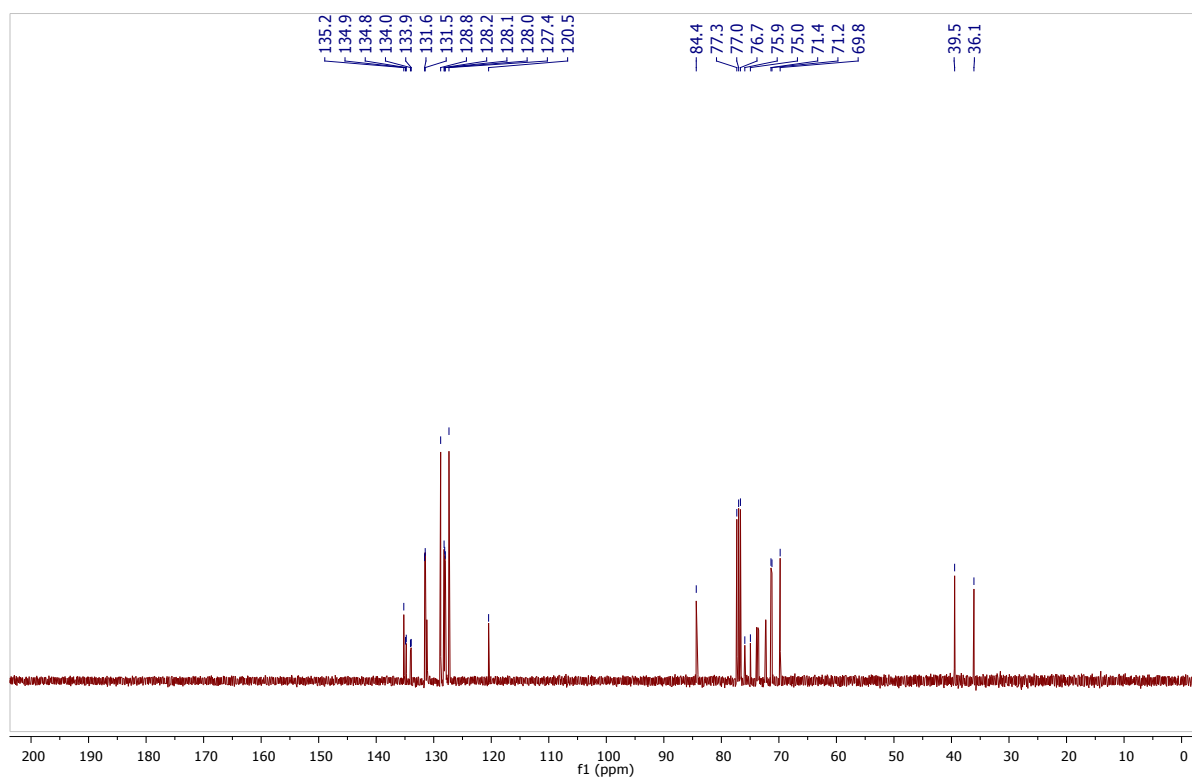

Figure S21.  $^1\text{H}$  and  $^{13}\text{C}$  NMR spectra of **4n**.

## Qualitative Analysis Report

|                        |              |               |                     |
|------------------------|--------------|---------------|---------------------|
| Data Filename          | CN-02.d      | Sample Name   | CN-02               |
| Sample Type            | Sample       | Position      | P1-E5               |
| Instrument Name        | Instrument 1 | User Name     |                     |
| Acq Method             | ESI pos.m    | Acquired Time | 3/3/2020 5:31:54 PM |
| IRM Calibration Status | Success      | DA Method     | Default.m           |
| Comment                |              |               |                     |

|              |      |                |                             |
|--------------|------|----------------|-----------------------------|
| Sample Group |      | Info.          |                             |
| Stream Name  | LC 1 | Acquisition SW | 6200 series TOF/6500 series |
|              |      | Version        | Q-TOF B.08.00 (B8058.0)     |

### User Spectra

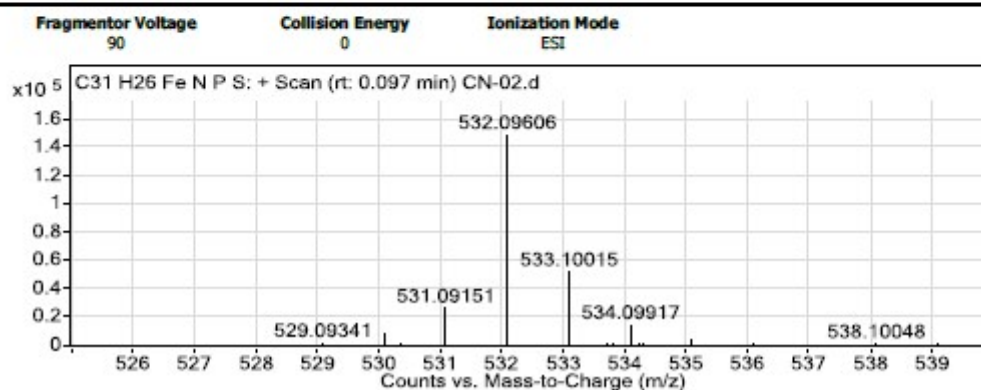

Figure S22. HRMS analysis report of **4n**.



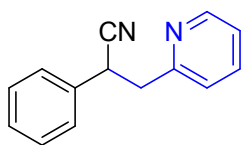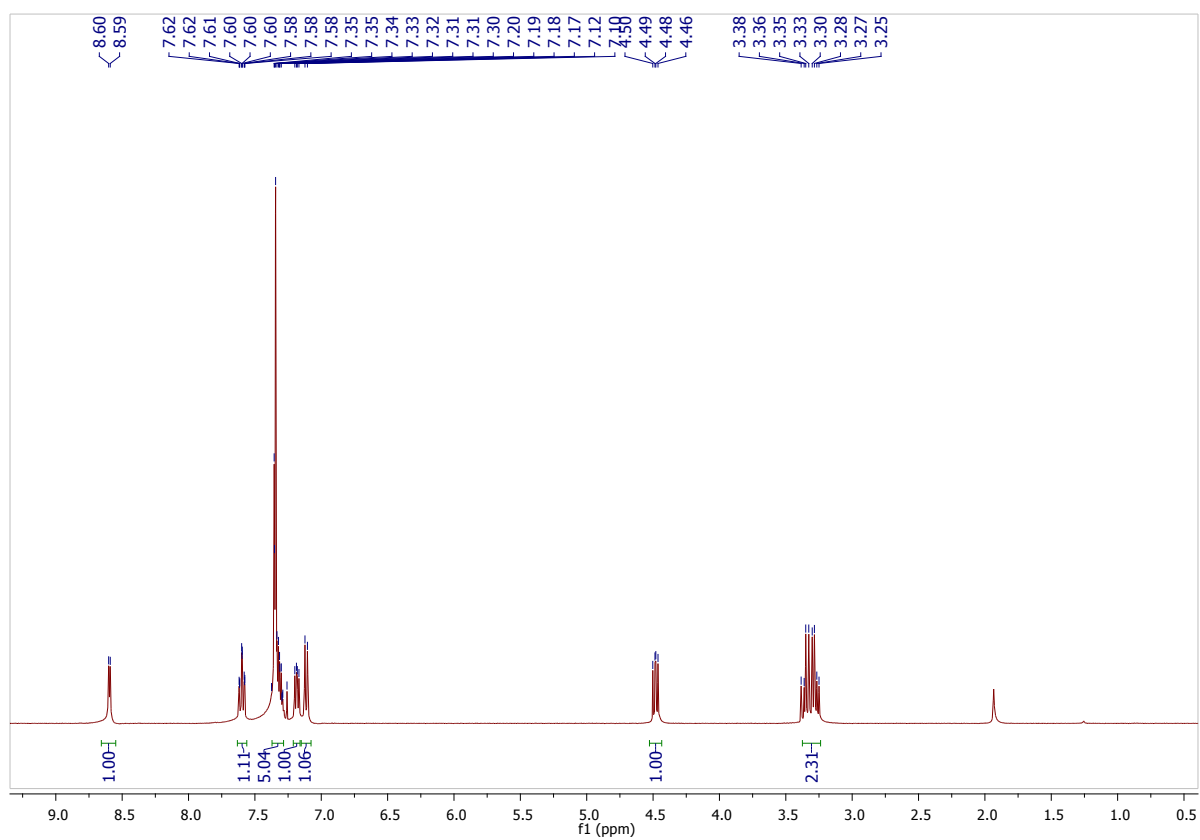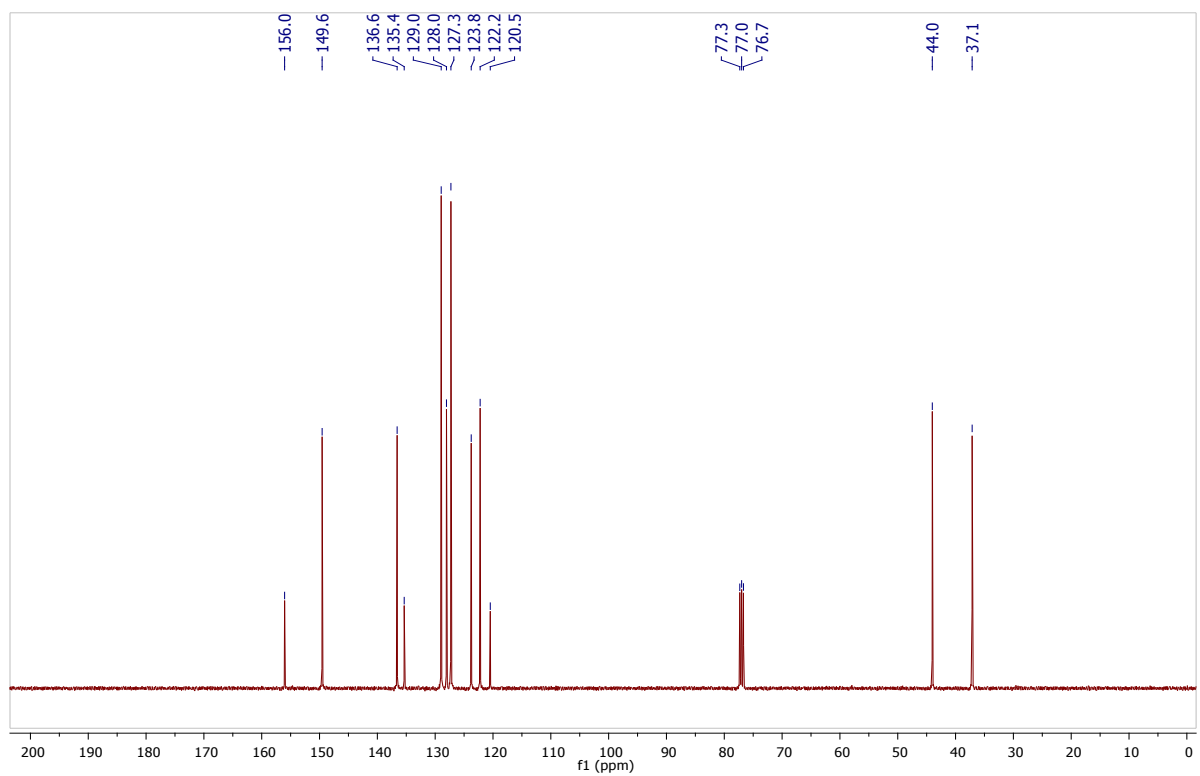

Figure S23. <sup>1</sup>H and <sup>13</sup>C NMR spectra of **40**.

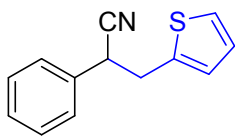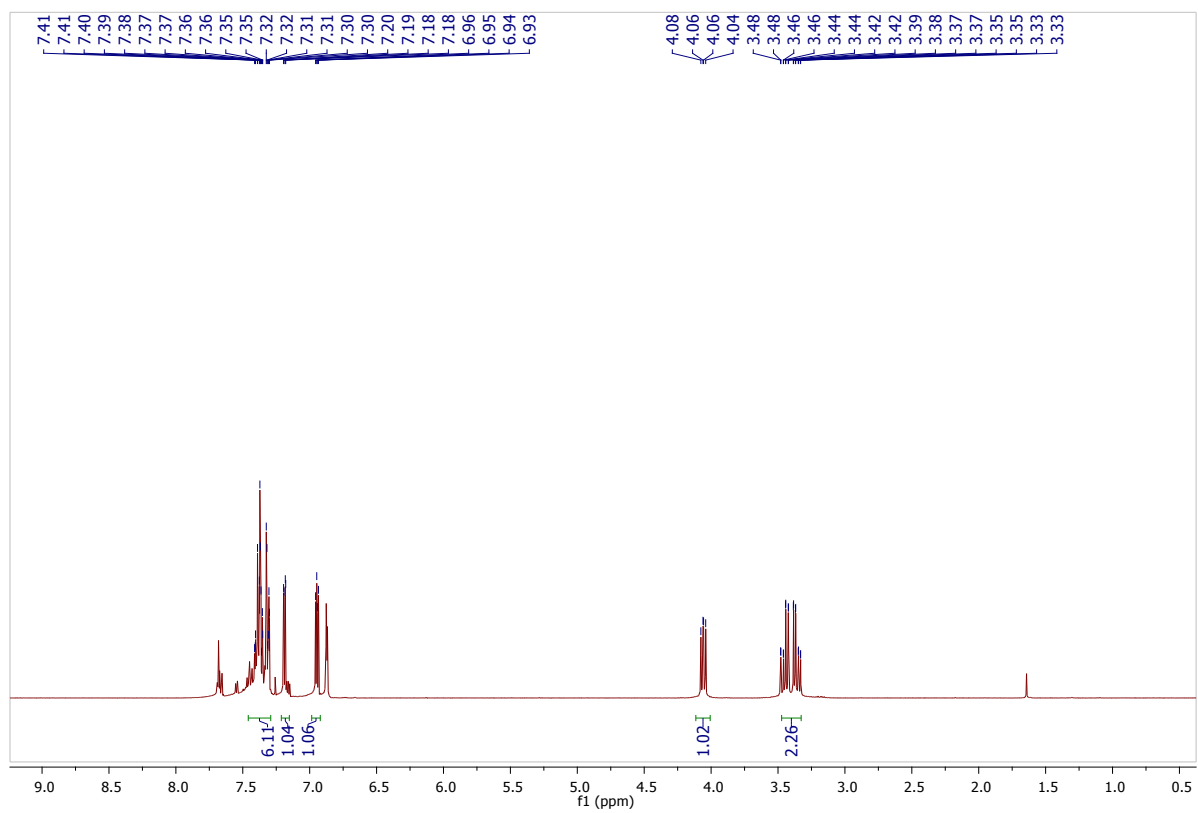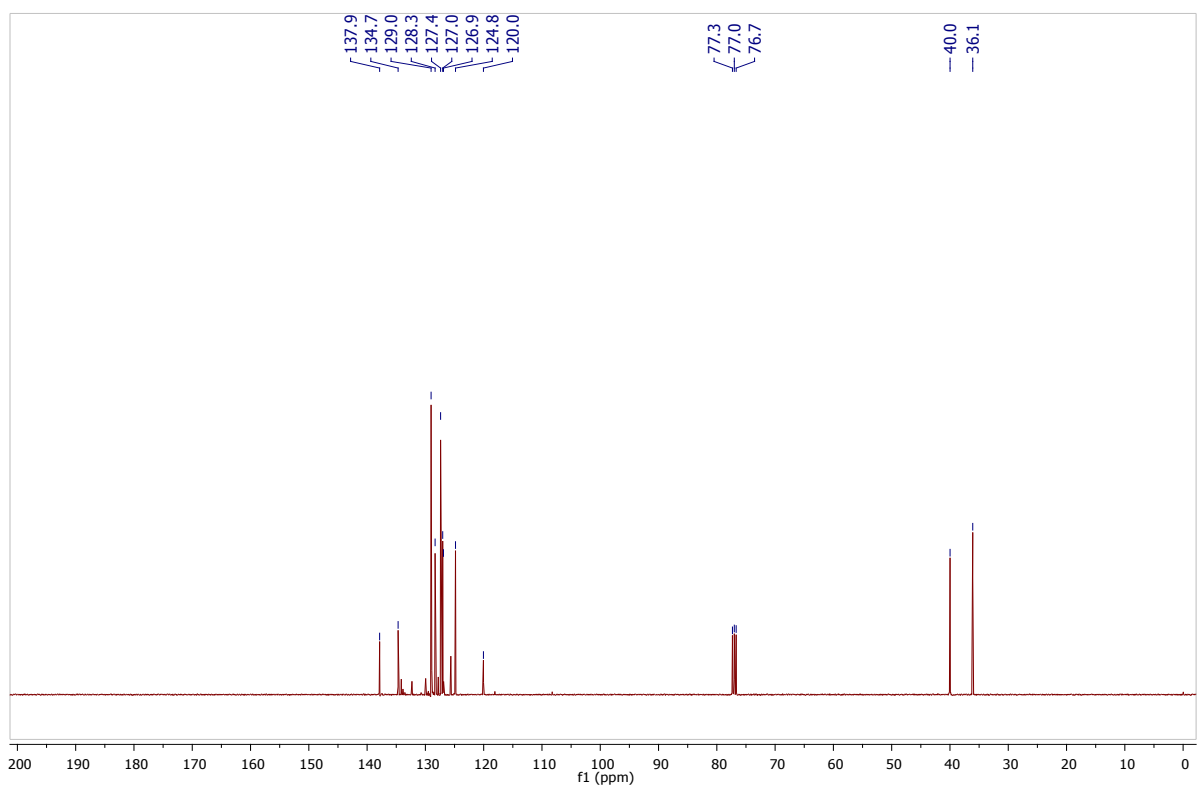

Figure S24.  $^1\text{H}$  and  $^{13}\text{C}$  NMR spectra of **4p**.

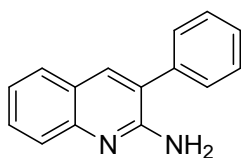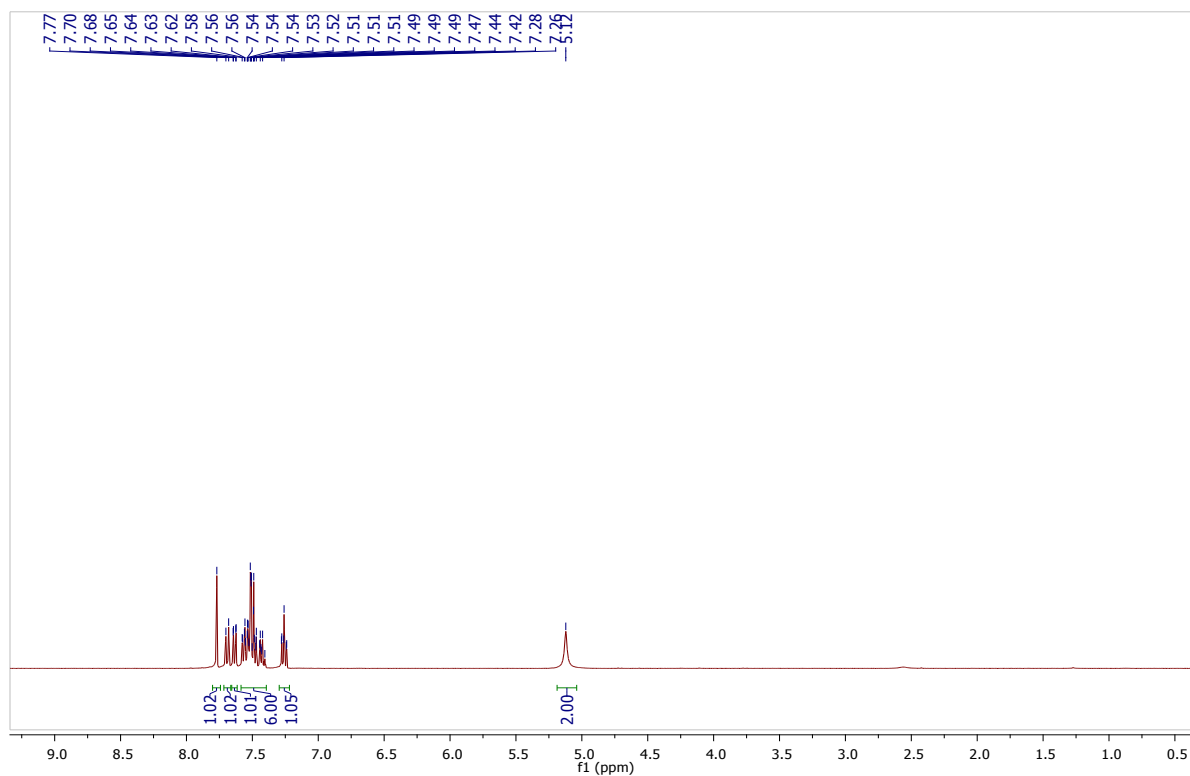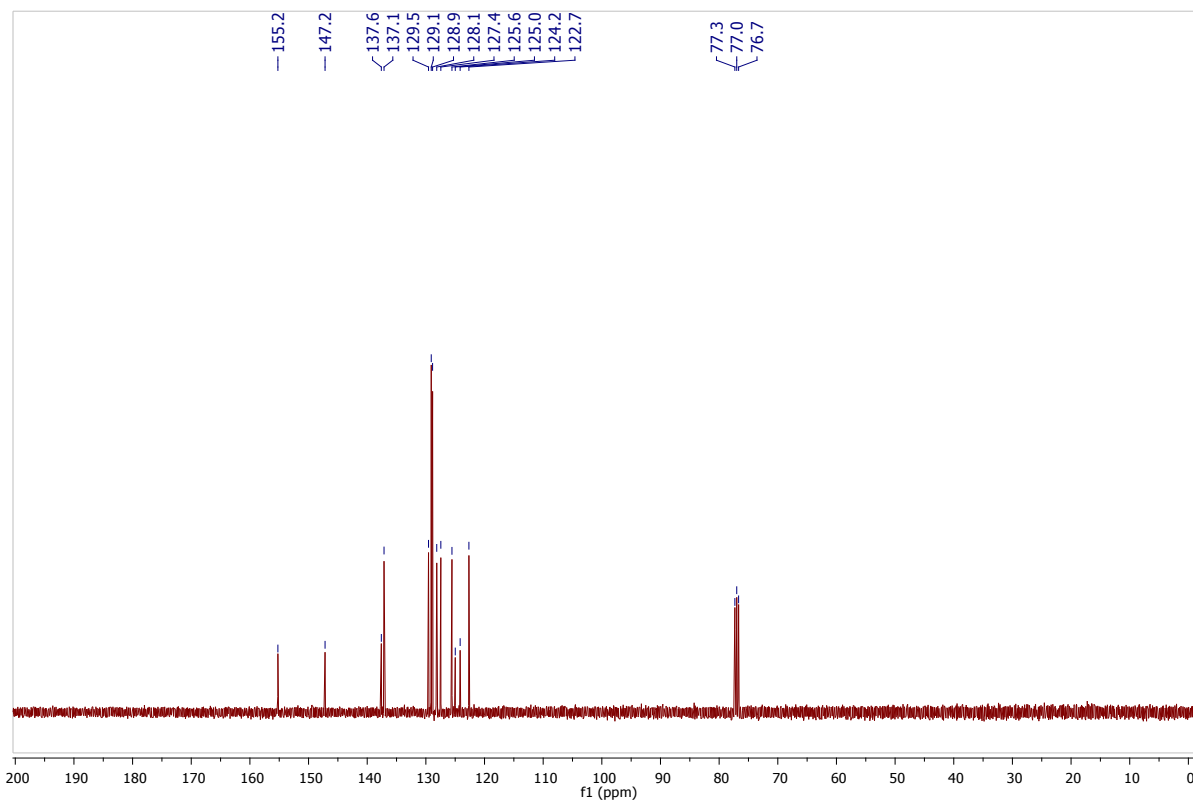

Figure S25. <sup>1</sup>H and <sup>13</sup>C NMR spectra of 6a.

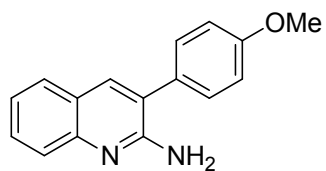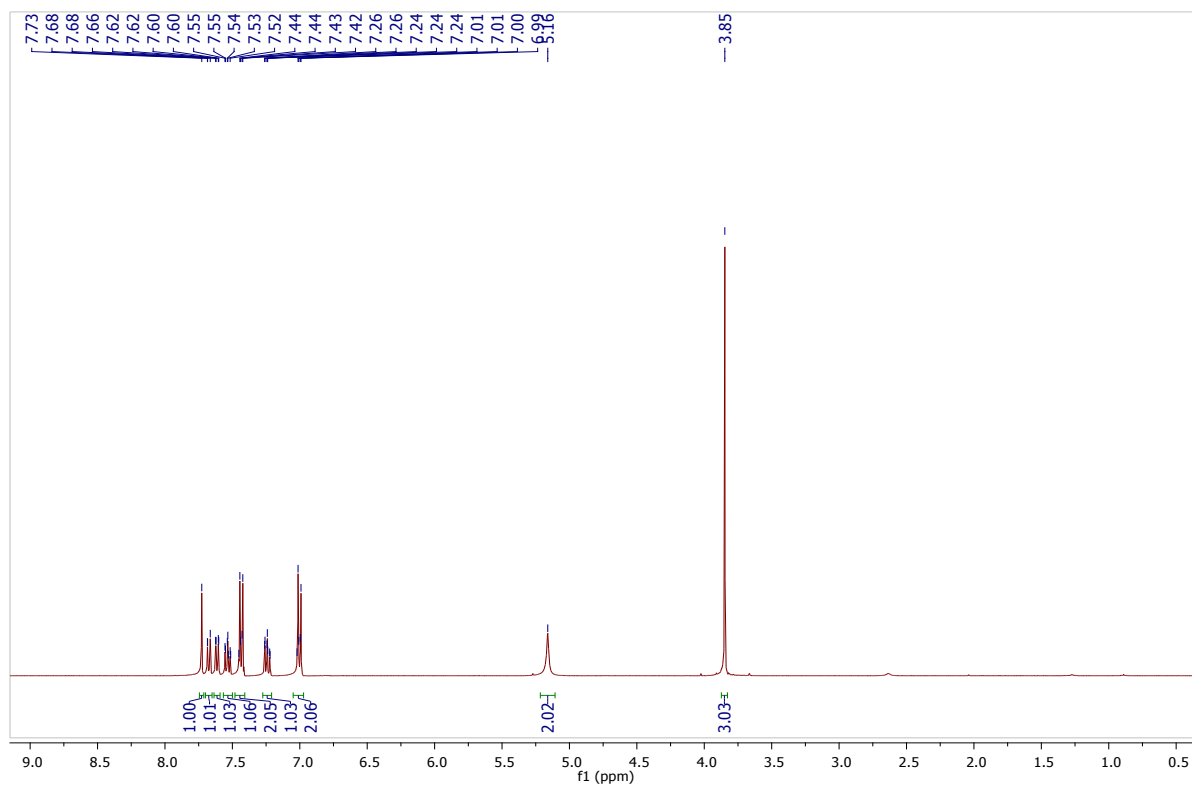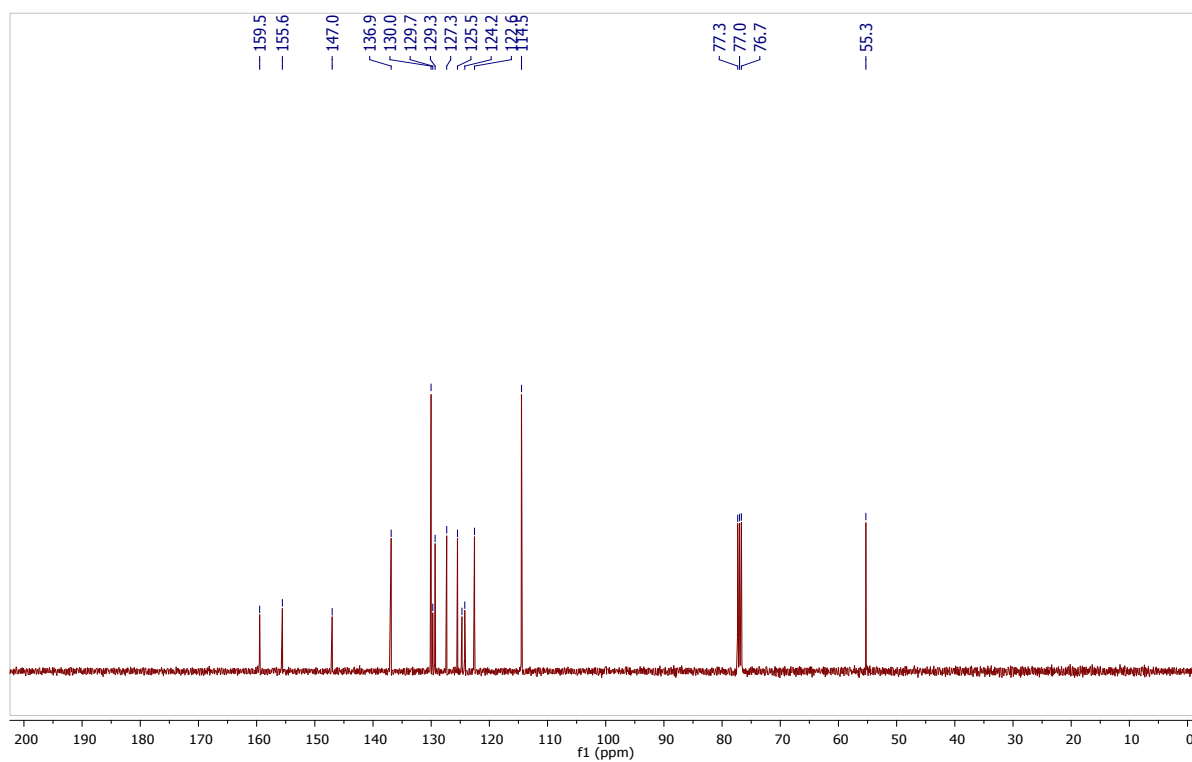

Figure S26.  $^1\text{H}$  and  $^{13}\text{C}$  NMR spectra of **6b**.

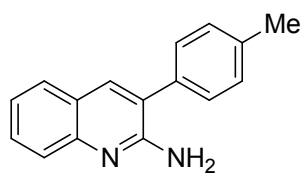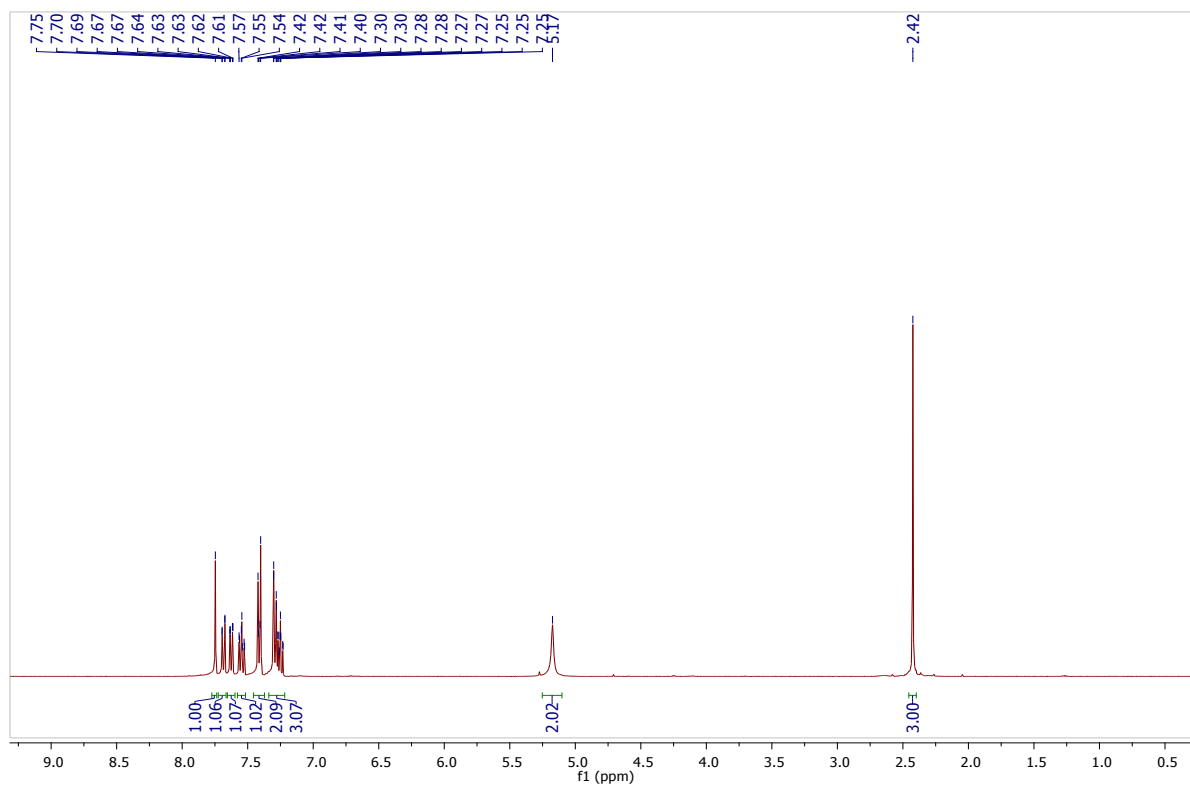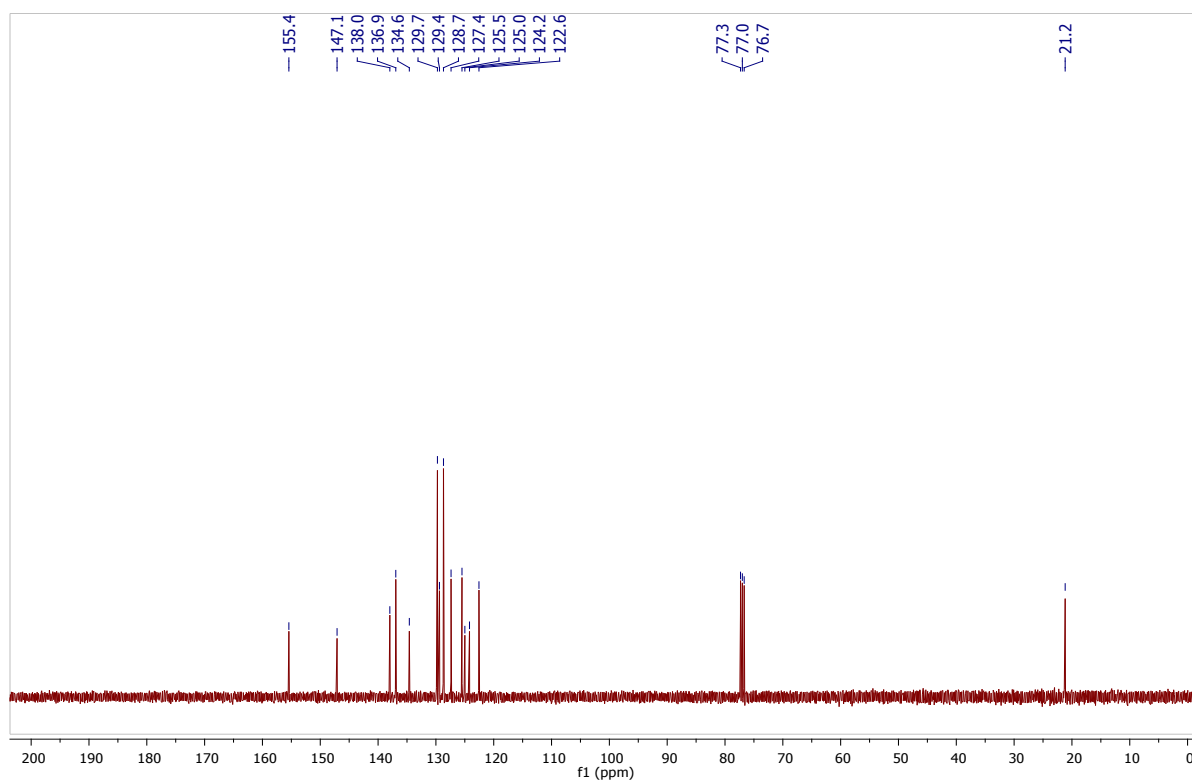

Figure S27.  $^1\text{H}$  and  $^{13}\text{C}$  NMR spectra of 6c.

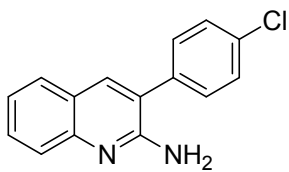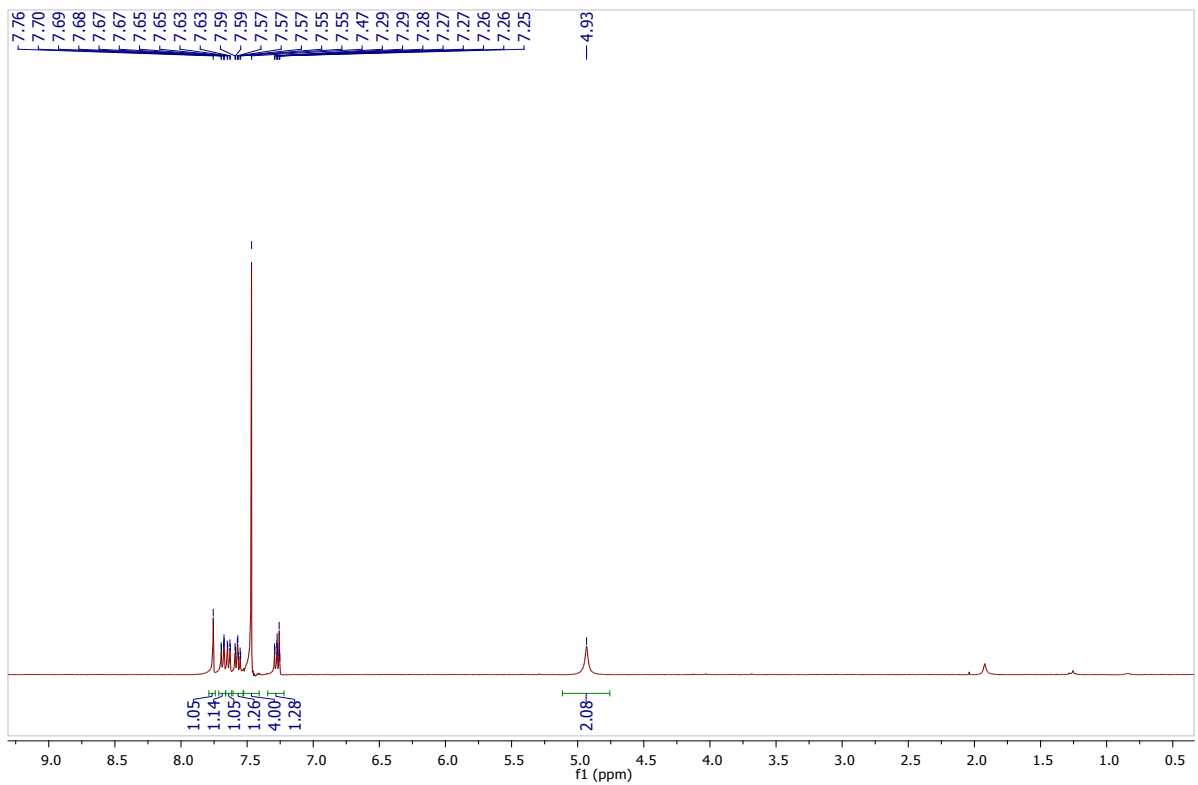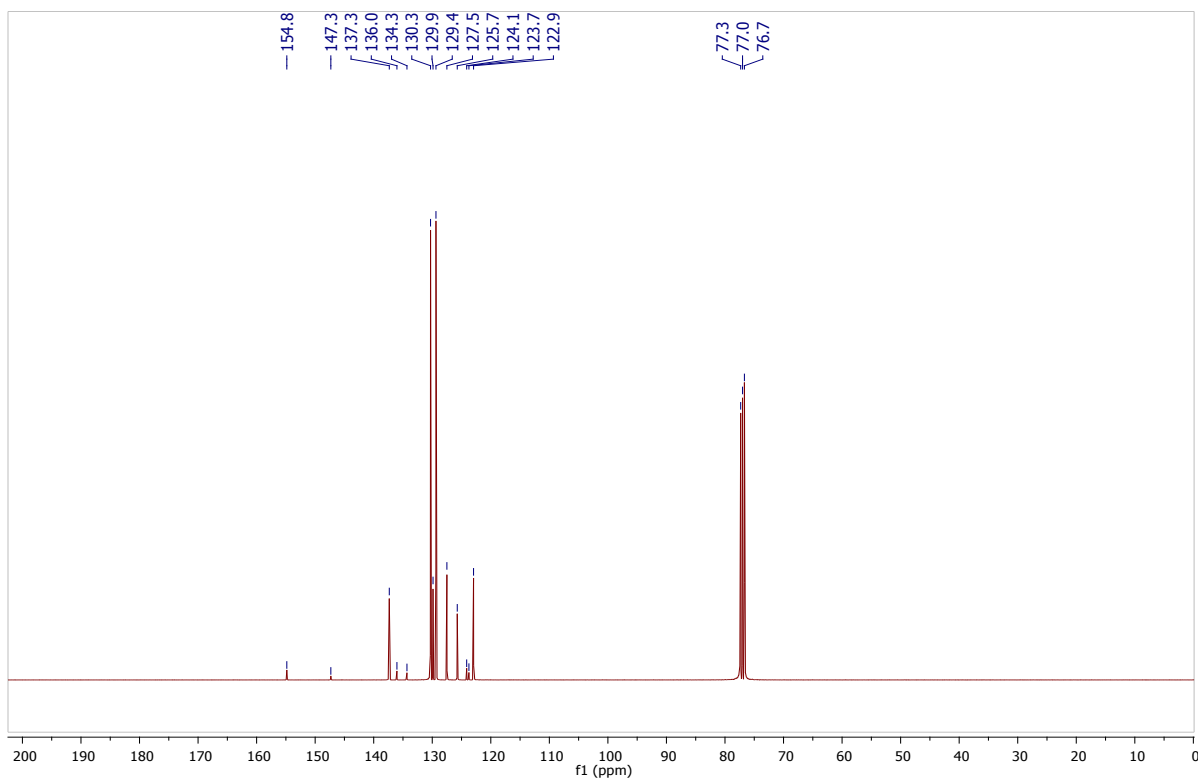

Figure S28. <sup>1</sup>H and <sup>13</sup>C NMR spectra of 6d.

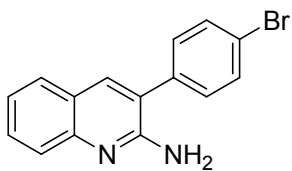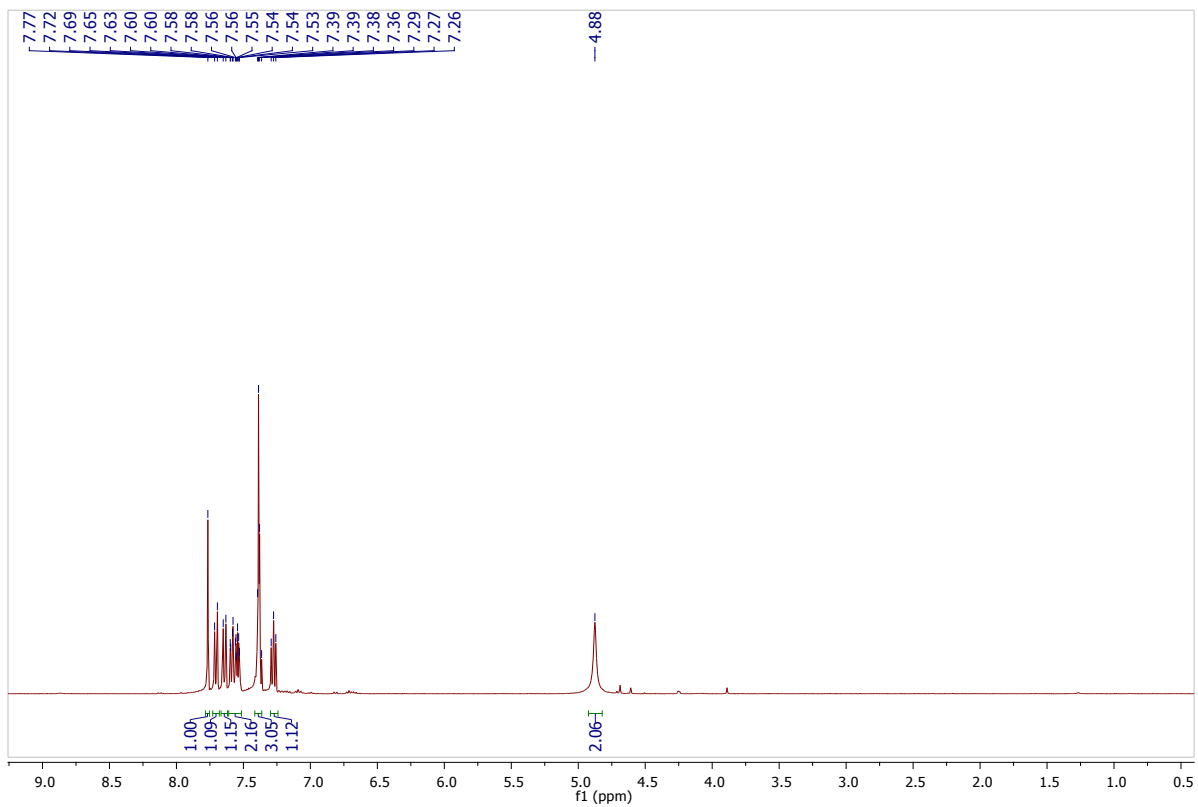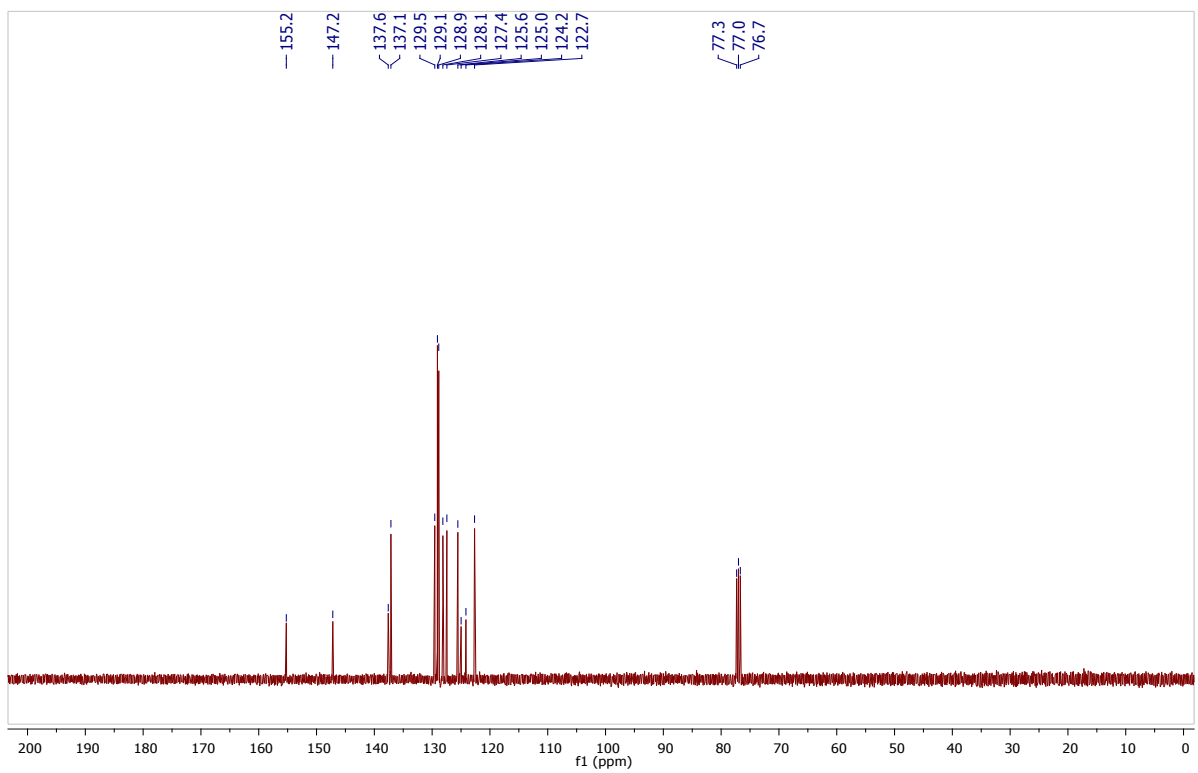

Figure S29. <sup>1</sup>H and <sup>13</sup>C NMR spectra of 6e.

```

=====
Acq. Operator   : gozde
Acq. Instrument : Instrument 1           Location : Vial 1
Injection Date  : 12/22/2020 2:43:50 PM
                                           Inj Volume : Manually

Acq. Method     : C:\CHEM32\1\METHODS\23112020.M
Last changed    : 12/22/2020 2:38:44 PM by gozde
Analysis Method : C:\CHEM32\1\METHODS\22122020.M
Last changed    : 12/22/2020 3:07:52 PM by gozde
Sample Info     : CN
  
```

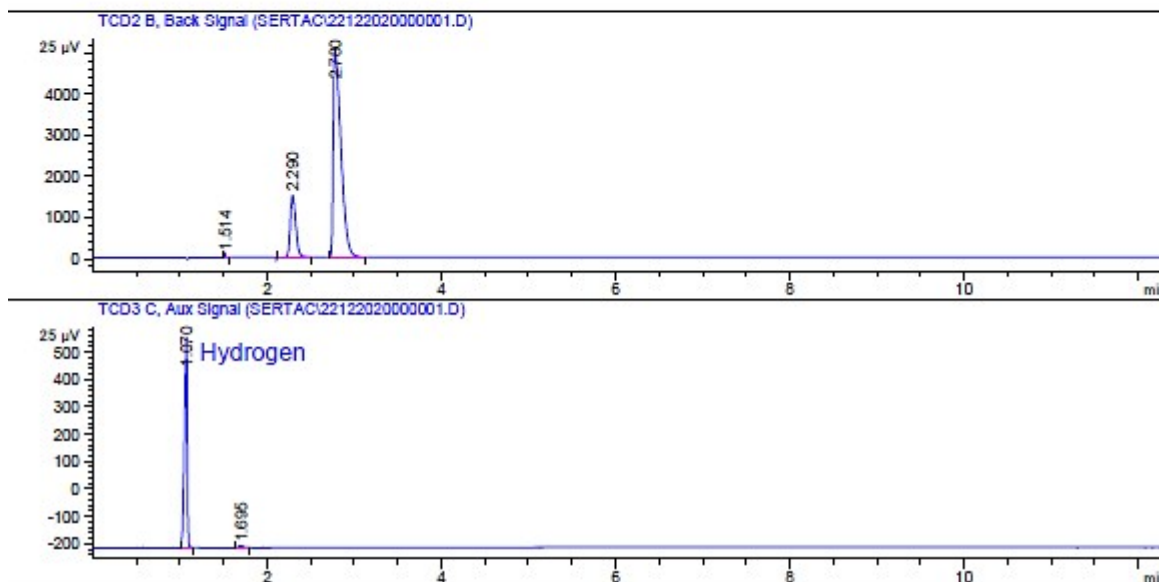

Signal 2: TCD2 B, Back Signal

| RetTime [min] | Type | Area [25 µV*s] | Amt/Area   | Amount [% mole] | Grp | Name |
|---------------|------|----------------|------------|-----------------|-----|------|
| 1.795         | -    | -              | -          | -               | -   | CO2  |
| 2.290         | BB   | 6839.18994     | 0.00000    | 0.00000         | -   | -    |
| 2.780         | BB S | 3.11195e4      | 2.27134e-3 | 70.68298        | -   | N2   |
| 4.250         | -    | -              | -          | -               | -   | CO   |

Totals : 70.68298

Signal 3: TCD3 C, Aux Signal

| RetTime [min] | Type | Area [25 µV*s] | Amt/Area   | Amount [% mole] | Grp | Name |
|---------------|------|----------------|------------|-----------------|-----|------|
| 1.070         | BB   | 1806.53967     | 5.30129e-3 | 9.57700         | -   | H2   |

Totals : 9.57700

Figure S30. GC traces to confirm H<sub>2</sub> evolution.
